1      **The structural, dynamical and biochemical characterizations of *Verticillium dahliae***  
2                                                    **pectate lyase, VdPelB, highlight its specificities**

3  
4      Josip Safran<sup>1</sup>, Vanessa Ung<sup>2</sup>, Julie Bouckaert<sup>3</sup>, Olivier Habrylo<sup>1</sup>, Roland Molinié<sup>1</sup>, Jean-Xavier  
5      Fontaine<sup>1</sup>, Adrien Lemaire<sup>1</sup>, Aline Voxeur<sup>4</sup>, Serge Pilard<sup>5</sup>, Corinne Pau-Roblot<sup>1</sup>, Davide  
6      Mercadante<sup>2</sup>, Jérôme Pelloux<sup>1\*</sup>, Fabien Sénéchal<sup>1\*</sup>

7  
8  
9      <sup>1</sup> : UMRT INRAE 1158 BioEcoAgro – BIOPI Biologie des Plantes et Innovation, Université  
10      de Picardie, 33 Rue St Leu, 80039 Amiens, France. <sup>2</sup> : School of Chemical Sciences, The  
11      University of Auckland, Private Bag 92019, Auckland 1142, New Zealand. <sup>3</sup> : UMR 8576  
12      Unité de Glycobiologie Structurale et Fonctionnelle (UGSF) IRI50, Avenue de Halley, 59658  
13      Villeneuve d’Ascq, France. <sup>4</sup> : Université Paris-Saclay, INRAE, AgroParisTech, Institut Jean-  
14      Pierre Bourgin (IJPB), 78000, Versailles, France. <sup>5</sup> : Plateforme Analytique, Université de  
15      Picardie, 33, Rue St Leu, 80039 Amiens, France.

16      \*contributed equally as last authors

17      **Corresponding author:** Fabien Sénéchal ([fabien.senechal@u-picardie.fr](mailto:fabien.senechal@u-picardie.fr)) and Jérôme Pelloux  
18      ([jerome.pelloux@u-picardie.fr](mailto:jerome.pelloux@u-picardie.fr))

19      UMR INRAE 1158 BioEcoAgro-Biologie des Plantes et Innovation, Université de Picardie  
20      Jules Verne, UFR des Sciences, 33 Rue St Leu, 80039 Amiens, France

21

22 **Abstract**

23 Pectins, complex polysaccharides and major components of the plant primary cell wall, can be  
24 degraded by pectate lyases (PLs). PLs cleave glycosidic bonds of homogalacturonans (HG), the  
25 main pectic domain, by  $\beta$ -elimination, releasing unsaturated oligogalacturonides (OGs). To  
26 understand the catalytic mechanism and structure/function of these enzymes, we characterized  
27 VdPelB from *Verticillium dahliae*, a plant pathogen. We first solved the crystal structure of  
28 VdPelB at 1.2Å resolution showing that it is a right-handed parallel  $\beta$ -helix structure. Molecular  
29 dynamics (MD) simulations further highlighted the dynamics of the enzyme in complex with  
30 substrates that vary in their degree of methylesterification, identifying amino acids involved in  
31 substrate binding and cleavage of non-methylesterified pectins. We then biochemically  
32 characterized wild type and mutated forms of VdPelB. VdPelB was most active on non-  
33 methylesterified pectins, at pH 8 in presence of  $\text{Ca}^{2+}$  ions. VdPelB-G125R mutant was most  
34 active at pH 9 and showed higher relative activity compared to native enzyme. The OGs  
35 released by VdPelB differed to that of previously characterized PLs, showing its peculiar  
36 specificity in relation to its structure. OGs released from *Verticillium*-partially tolerant and  
37 sensitive flax cultivars differed which could facilitate the identification VdPelB-mediated  
38 elicitors of defence responses.

39

40

41

42 **Keywords:** Pectate lyase, pectins, homogalacturonan, oligogalacturonides, Flax, *Verticillium*  
43 *dahliae*.

44

## 45 1. Introduction

46 Primary cell wall, a complex structure of proteins and polysaccharides, cellulose and  
47 hemicelluloses, is embedded in a pectin matrix. Pectins, are complex polysaccharides  
48 composing up to 30% of cell wall dry mass in dicotyledonous species [1]. Pectin is mainly  
49 constituted of homogalacturonan (HG), rhamnogalacturonan I (RG-I) and rhamnogalacturonan  
50 II (RG-II) domains, but its composition can differ between plant organs and among species.  
51 The most abundant pectic domain is HG, a linear homopolymer of  $\alpha$ -1,4-linked galacturonic  
52 acids (GalA), which represents up to 65% of pectins [2]. During synthesis, HG can be O-  
53 acetylated at O-2 or O-3 and/or methylesterified at C-6 carboxyl, before being exported at the  
54 cell wall with a degree of methylesterification (DM) of ~80% and a degree of acetylation (DA)  
55 of ~5-10%, depending on species [3]. At the wall, HG chains can be modified by different  
56 enzyme families, including pectin acetyltransferase (PAEs; EC 3.1.1.6), pectin methylesterases  
57 (PMEs; CE8, EC 3.1.1.11), polygalacturonases (PGs; GH28, EC 3.2.1.15, EC 3.2.1.67, EC  
58 3.2.1.82), and pectin lyases-like (PLLs), which comprise pectate lyases (PLs; EC 4.2.2.2) and  
59 pectin lyase (PNLs, EC 4.2.2.10). All these enzymes are produced by plants to fine-tune pectin  
60 during development [4–8], but they are also secreted by most phytopathogenic bacteria and  
61 fungi during plant infection [9–13]. PMEs and PAE hydrolyse the O6-ester and O2-acetylated  
62 linkages, respectively, leading to a higher susceptibility of HG to PG- and PLL-mediated  
63 degradation [14]. PLL are pectolytic enzymes that cleave HG via a  $\beta$ -elimination mechanism  
64 leading to the formation of an unsaturated C4-C5 bond [15], and can be divided into two  
65 subfamilies depending on their biochemical specificities: i) PLs have a high affinity for non- or  
66 low-methylesterified pectins and an optimal pH near 8.5. Their activity requires  $\text{Ca}^{2+}$  ions. ii)  
67 PNLs are most active on high-DM pectins at acidic pH values [16]. Both type of enzymes can  
68 degrade HG chains, and release oligogalacturonides (OGs), but their mode of action can differ.  
69 For PLs both endo and exo modes of action have been described, while only endo-PNL have  
70 been characterised so far [17]. For the latter, it was notably shown that endo-PNLs from *B.*  
71 *fuckeliana*, *A. parasiticus* and *Aspergillus* sp., can first release OGs with degrees of  
72 polymerisation (DP) 5–7, that are subsequently used as substrates, generating OGs of DP3 and  
73 DP4 as end-products [9,18,19]. Despite having the same DP, the final products can differ in  
74 their degrees and patterns of methylesterification and acetylation (DM/DA) depending on the  
75 enzymes' specificities; implying potential differences in substrate binding, and therefore in  
76 PLLs fine structures. Several crystallographic structures of bacterial and fungal PLL have been  
77 reported [15,20–24]. Overall, the PLL fold resemble that of published PME, PGs and

78 rhamnogalacturonan lyases [25–27], and is composed of three parallel  $\beta$ -sheets forming a right-  
79 handed parallel  $\beta$ -helix. The three  $\beta$ -sheets are called PB1, PB2 and PB3 and the turns  
80 connecting them T1, T2 and T3 [28]. The active site features three Asp, localized on the PB1  
81  $\beta$ -sheet and, in the case of PLs, accommodates  $\text{Ca}^{2+}$  [29]. In PNLs,  $\text{Ca}^{2+}$  is, on the other hand,  
82 replaced by Asp [15]. Additionally, the PL binding site is dominated by charged acidic and  
83 basic residues (Gln, Lys, Arg) which can accommodate negatively charged pectate substrates.  
84 In contrast, the PNL binding site is dominated by aromatic residues [15,29], which have less  
85 affinity for lowly methylesterified pectins. These differences in structure could translate into  
86 distinct enzyme dynamics when in complex with substrates of varying degrees of  
87 methylesterification.

88 In fungi, PLLs are encoded by large multigenic families which are expressed during  
89 infection. *Verticillium dahliae* Kleb., a soil-borne vascular fungus, targets a large number of  
90 plant species, causing Verticillium wilt disease to become widespread among fiber flax, with  
91 detrimental effects to fiber quality [30–32]. *V. dahliae* infects plants by piercing the root surface  
92 using hyphae, secreting a number of pectinolytic enzymes, including thirteen PLLs.  
93 Considering the role of PLLs in determining pathogenicity, it is of paramount importance to  
94 determine their biochemical and structural properties [30,33,34]. This could allow engineering  
95 novel strategies to control or inhibit, the pathogen's pectinolytic arsenal. For this purpose, we  
96 characterized, via combined experimental and computational approaches, one *V. dahliae* PLL  
97 (VdPelB, VDAG\_04718) after its heterologous expression in *P. pastoris*. The obtention of the  
98 3D structure of VdPelB after X-ray diffraction and the analysis of enzyme dynamics when in  
99 complex with substrates of distinct DM, allowed the identification of the residues favouring  
100 pectate lyase (PL) activity. Experiments confirmed the importance of these residues in  
101 mediating PL activity showing that VdPelB is a *bona fide* PL, that releases peculiar OG as  
102 compared to previously characterized PLs. More importantly, the OGs released from roots of  
103 *Verticillium*-partially tolerant and sensitive flax cultivars differed, paving the way for the  
104 identification of VdPelB-mediated OGs that can trigger plant defence mechanisms.

105

## 106 **2. Material and methods**

### 107 **2.1. Bioinformatical analysis**

108 *Verticillium dahliae* PLL sequences were retrieved using available genome database  
109 (<ftp.broadinstitute.org/>). SignalP-5.0 Server (<http://www.cbs.dtu.dk/services/SignalP/>) was

110 used for identifying putative signal peptide and putative glycosylation sites were predicted  
111 using NetNGlyc 1.0 Server (<http://www.cbs.dtu.dk/services/NetNGlyc/>) and NetOGlyc 4.0  
112 Server (<http://www.cbs.dtu.dk/services/NetOGlyc/>). Sequences were aligned and phylogenetic  
113 analysis was carried out using MEGA multiple sequence alignment program  
114 (<https://www.megasoftware.net/>). Homology models were created using I-TASSER structure  
115 prediction software (<https://zhanglab.ccmb.med.umich.edu/I-TASSER/>) and UCSF Chimera  
116 (<http://www.cgl.ucsf.edu/chimera/>) was used for creation of graphics.

## 117 **2.2. Fungal strain and growth**

118 *V.dahliae* was isolated from CALIRA company flax test fields (Martainneville, France) and  
119 was kindly provided by Linéa-Semences company (Grandvilliers, France). Fungus was grown  
120 as described in Safran et al. [35]. Briefly, fungus was grown in polygalacturonic acid sodium  
121 salt (PGA, P3850, Sigma) at 10 g.L<sup>-1</sup> and in pectin methylesterified potassium salt from citrus  
122 fruit (55–70% DM, P9436, Sigma) solutions to induce PLL expression. After 15 days of growth  
123 in dark conditions at 25°C and 80 rpm shaking, mycelium was collected and filtered under  
124 vacuum using Buchner flask. Collected mycelium was frozen in liquid nitrogen, lyophilized  
125 and ground. Isolation of RNA and cDNA synthesis was realized as previously described in  
126 Lemaire et al.[36].

## 127 **2.3. Cloning, heterologous expression and purification of VdPelB**

128 *V. dahliae* PelB coding sequence (VdPelB, UNIPROT: G2X3Y1, GenBank:  
129 EGY23280.1), minus the signal peptide was amplified using cDNA and gene-specific primers.  
130 VdPelB mutants were generated using cDNA and specific primers carrying mutations (Table  
131 S1). Cloning, heterologous expression in *P. pastoris* and purification of VdPelB was done as  
132 previously described in Safran et al. [35].

## 133 **2.4. Crystallization of VdPelB**

134 VdPelB was concentrated at 10 mg.mL<sup>-1</sup> in Tris-HCl pH 7.5 buffer. Crystallization  
135 conditions were screened using the sitting-drop vapor-diffusion method. VdPelB (100 nL) was  
136 mixed with an equal volume of precipitant (1:1) using Mosquito robot (STP Labtech). The  
137 crystals that resulted in best diffraction data were obtained with 0.1 M MIB (Malonic acid,  
138 Imidazole, Boric acid system) at pH 8.0, with 25 % PEG 1500 as the precipitant (condition B5  
139 from the PACT premier kit, Molecular Dimensions, Sheffield, UK) after 1 month. Optimization  
140 was realized using the hanging drop vapor-diffusion method forming the drop by mixing 1 µL

141 of precipitant solution with 1  $\mu$ L of the enzyme. The large beam-like crystals were cryo-  
142 protected by increasing PEG 1500 concentration to 35%, before mounting them in a loop and  
143 flash-cooling them in liquid nitrogen.

## 144 **2.5. VdPelB X-ray data collection and processing**

145 X-ray diffraction data were collected at the PROXIMA-2a beamline of the Soleil  
146 synchrotron (Saint Aubin, France), at a temperature of  $-173^{\circ}\text{C}$  using an EIGER 9M detector  
147 (Dectris). Upon a first data collection to 1.3  $\text{\AA}$  resolution, three more data sets were collected  
148 from the same crystal in order to obtain a complete data set. Thereby the kappa angle was tilted  
149 once to  $30^{\circ}$ , once to  $60^{\circ}$  and finally a helical data set was collected at 1.2  $\text{\AA}$  resolution. The  
150 reflections of each data set were indexed and integrated using XDS [37], scaled and merged  
151 using XSCALE [38]. The VdPelB crystal has a primitive monoclinic lattice in the  $P\ 1\ 2_1\ 1$  space  
152 group, with two molecules contained in asymmetric unit [39].

## 153 **2.6. Structure solution and refinement**

154 The structure of VdPelB was solved by molecular replacement using *Phaser* [40]. The data  
155 were phased using pectate lyase BsPelA (PDB: 3VMV, Uniprot D0VP31), as a search model  
156 [41]. Model was build using *Autobuild* and refined using *Refine* from PHENIX suite [42]. The  
157 model was iteratively improved with *Coot* [43] and *Refine*. The final structure for VdPelB has  
158 been deposited in the Protein Data Bank (PDB) as entry 7BBV.

## 159 **2.7. VdPelB biochemical characterization**

160 Pierce BCA Protein Assay Kit (Thermo Fisher Scientific, Waltham, Massachusetts, United  
161 States) was used to determine the protein concentration, with Bovine Serum Albumin (A7906,  
162 Sigma) as a standard. Deglycosylation was performed using Peptide-N-Glycosidase F (PNGase  
163 F) at  $37^{\circ}\text{C}$  for one hour according to the supplier's protocol (New England Biolabs, Hitchin,  
164 UK). Enzyme purity and molecular weight were estimated using a 12% SDS-PAGE and mini-  
165 PROTEAN 3 system (BioRad, Hercules, California, United States). Gels were stained using  
166 PageBlue Protein Staining Solution (Thermo Fisher Scientific) according to the manufacturer's  
167 protocol.

168 The substrate specificity of VdPelB was determined using PGA (81325, Sigma) and citrus  
169 pectin of various DM: 20–34% (P9311, Sigma), 55–70% (P9436, Sigma) and  $>85\%$  (P9561,  
170 Sigma), with  $0.5\ \mu\text{M}$   $\text{CaCl}_2$  or  $5\ \mu\text{M}$  EDTA (Sigma) final concentrations. Enzyme activity was  
171 measured by monitoring the increase in optical density at 235 nm due to formation of

172 unsaturated uronide product using UV/VIS Spectrophotometer (PowerWave Xs2, BioTek,  
173 France) during 60 min. The optimum temperature was determined by incubating the enzymatic  
174 reaction between 25 and 45°C for 8 min using PGA as a substrate (0.4%, w/v). The optimum  
175 pH was determined between pH 5 and 10 using sodium phosphate (NaP, pH 5 to 7) and Tris-  
176 HCl buffer (pH 7 to 10) and 0.4% (w/v) PGA as a substrate. All experiments were realized in  
177 triplicate.

## 178 **2.8. Digestion of commercial pectins and released OGs profiling**

179 OGs released after digestions by recombinant VdPelB or commercially available  
180 Aspergillus PL (named AsPel) were identified as described in Voxeur et al., 2019 [9], using a  
181 novel in-house OGs library. Briefly, DM 20–34% (P9311, Sigma) and sugar beet pectin with  
182 DM 42% and degree of acetylation (DA) 31% (CP Kelco, Atlanta, United States) were prepared  
183 at 0.4 % (w/v) final concentration diluted in 50 mM Tris-HCl buffer (pH 8) and incubated with  
184 either VdPelB or AsPel (E-PCLYAN, Megazyme). For each substrate, enzyme concentrations  
185 were adjusted to have enzymes at iso-activities (Table S2). For each substrate two dilutions,  
186 were used for analysing OGs released in early, VdPelB-2 and AsPel-2, and late phase, VdPelB-  
187 1 and AsPel-1, of digestions. Digestions were performed overnight. Non-digested pectins were  
188 pelleted by centrifugation and the supernatant dried in a speed vacuum concentrator  
189 (Concentrator plus, Eppendorf, Hamburg, Germany). Separation of OGs was done as  
190 previously described using an ACQUITY UPLC Protein BEH SEC column (125Å, 1.7 µm, 4.6  
191 mm x 300 mm) [44]. The intensities were defined as the area under the curve, for each OG.  
192 Peak areas were clustered by hierarchical clustering with complete linkage on the euclidian  
193 distance matrix and visualized in the heatmap-package using R version 3.6.0.

## 194 **2.9. Digestion of commercial pectins and released OGs profiling**

195 OGs released after digestions by recombinant VdPelB or commercially available  
196 Aspergillus PL (named AsPel) were identified as described in Voxeur et al., 2019 [9], using a  
197 novel in-house OGs library. Briefly, DM 20–34% (P9311, Sigma) and sugar beet pectin with  
198 DM 42% and degree of acetylation (DA) 31% (CP Kelco, Atlanta, United States) were prepared  
199 at 0.4 % (w/v) final concentration diluted in 50 mM Tris-HCl buffer (pH 8) and incubated with  
200 either VdPelB or AsPel (E-PCLYAN, Megazyme). For each substrate, enzyme concentrations  
201 were adjusted to have enzymes at iso-activities (**Table S2**). For each substrate two dilutions,  
202 were used for analysing OGs released in early, VdPelB-2 and AsPel-2 and late phase, VdPelB-  
203 1 and AsPel-1, of digestion. Digestions were performed overnight. Non-digested pectins were



204 pelleted by centrifugation and the supernatant dried in a speed vacuum concentrator  
205 (Concentrator plus, Eppendorf, Hamburg, Germany). Separation of OGs was done as  
206 previously described using an ACQUITY UPLC Protein BEH SEC column (125Å, 1.7 µm, 4.6  
207 mm x 300 mm) [44]. The intensities were defined as the area under the curve, for each OG.  
208 Peak areas were clustered by hierarchical clustering with complete linkage on the euclidian  
209 distance matrix and visualized in the heatmap-package using R version 3.6.0.

## 210 **2.10.Molecular Dynamics simulations**

211 Two sets of molecular dynamics (MD) simulations were conducted on the VdPelB protein:  
212 one in complex with a fully non-methylesterified polygalacturonate deca-saccharide, and the  
213 other with a fully methylesterified polygalacturonate deca-saccharide. Parameters specified by  
214 the AMBER14SB\_parmbsc1 forcefield [45] were used to create the molecular topologies of  
215 the complexes. Each complex was set up in a cubic box with solute-box distances of 1.0 nm  
216 and solvated with water molecules specific to the TIP3P water model [46]. Na<sup>+</sup> and Cl<sup>-</sup> ions  
217 were added to neutralise the system's net charge and reach a salt concentration of 0.165 M.  
218 Using a steep-descent algorithm with a step size of 0.01, energy minimisation was performed  
219 to resolve clashes between particles, with convergence being established at a particle-particle  
220 force of 1000 kJ mol<sup>-1</sup> nm<sup>-1</sup>. Particle-particle forces were calculated by considering van der  
221 Waals and electrostatic interactions occurring up to 1.0 nm, as well as long-range electrostatics  
222 treated in the Fourier space using the Particle Mesh Ewald (PME) summation method. Solvent  
223 equilibration was attained post minimisation in two stages: through the nVT and nPT  
224 ensembles, to reach constant temperature and pressure, respectively. Equilibration of the  
225 solvent under the nVT ensemble was conducted for 1 ns, integrating the equation of motion at  
226 a time step of 2 fs. The target reference temperature was 310.15 K, coupled every 0.1 ps using  
227 the V-rescale thermostat3. Based on the Maxwell-Boltzmann distribution [47] at 310.15 K,  
228 random velocities were then assigned to each particle in the system. Finally, solvent  
229 equilibration under the nPT ensemble was conducted for 1 ns, continuing from the last step of  
230 the previous equilibration, in terms of particle coordinates and velocities, at a reference  
231 temperature of 310.15 K, coupled every 0.1 ps using the V-rescale thermostat [48]. Here,  
232 pressure coupling was isotropically coupled every 2.0 ps, at 1 bar, using the Parrinello-Rahman  
233 barostat [49]. Particle-particle interactions were computed by constructing pair lists using the  
234 Verlet scheme. Short-range van der Waals and electrostatic interactions sampled through a  
235 Coulomb potential, were calculated at a cutoff of 1.0 nm. The PME algorithm [50] was used to  
236 compute long-range electrostatic interactions beyond this cut-off in the Fourier space, utilising



237 a Fourier grid spacing of 0.16 and a cubic B-spline interpolation level at 4. The simulations  
238 were then performed on in-house machines, using GROMACS (Groningen Machine for  
239 Chemical Simulations) version 2021.37. Each set of simulations were run for 150 ns each, at a  
240 time step of 2 fs, with molecular dynamics trajectories written out every 10 ps. Simulations  
241 were replicated 7 times for a total production run time of 1.05  $\mu$ s per complex. Replicates  
242 differed with respect to the random particle velocity sets computed under the nVT ensemble.  
243 For analysis, the first 50 ns of each production run were discarded as equilibration time. In-  
244 house Python 3 scripts implemented using Jupyter notebooks [51] were used to carry out  
245 analyses. Figures were created and rendered with Matplotlib [52] and VMD (Visual Molecular  
246 Dynamics)[53].

247

### 248 **3. Results and Discussion**

#### 249 **3.1. Sequence and phylogeny analysis**

250 In addition to 9 polygalacturonases (PGs) and 4 pectin methylesterases (PMEs), *V.*  
251 *dahliae* encodes 30 putative endo-pectate lyases (EC 4.2.2.2), exo-pectate lyases (EC 4.2.2.9),  
252 endo-pectin lyases (EC 4.2.2.10), belonging to PL1-PL3 and PL9 families, respectively [54].  
253 For hierarchical clustering of *Verticilium*'s sequences with other PLLs, fifty-one amino acid  
254 (aa) sequences encoding putative PLLs, belonging to bacteria, fungi and plants were aligned  
255 and a phylogenetic tree was built. Different clades can be distinguished. (**Fig. 1**). *V. dahliae*  
256 PelB (VdPelB, VDAG\_04718) clustered with VDAG\_05344 (59.68% sequence identity) with  
257 close relations to VDAG\_05402 (57.19% sequence identity) and VDAG\_07566 (56.95%  
258 sequence identity). VDAG\_05402 and VDAG\_05344, that are found in the protein secretome,  
259 have orthologs in *V. alfalfa* (VDBG\_07839 and VDBG\_10041), which were shown to possess  
260 putative lyase activity [34,55]. Plant PLLs from *A. thaliana* (AtPLL21, AtPLL15 and AtPLL18)  
261 formed a separate clade with close connections to *A. denitrificans* (AdVexL), a PLL homologue  
262 [56]. *D. dadanti* (DdPelI), *Bacillus Sp.* KSM-P15 (BsPel-P15) and *C. bescii* (CbPel1854)  
263 formed separate clades similarly to *B. subtilis* and *D. dadantii* PLs (BsPel, DdPelA and  
264 DdPelC). The clade corresponding to PNLs consisting of *A. tubingensis* PelA (AtPelA), *A.*  
265 *niger* (AnPelA, AnPnlA and AnPelB), *A. luchuensis* AlPelB was closely related to  
266 VDAG\_07238 and VDAG\_08154 which were indeed annotated as putative PNLs [18,54].  
267 VDAG\_06155 was previously named VdPel1 and previously characterized as a pectate lyase  
268 [33].

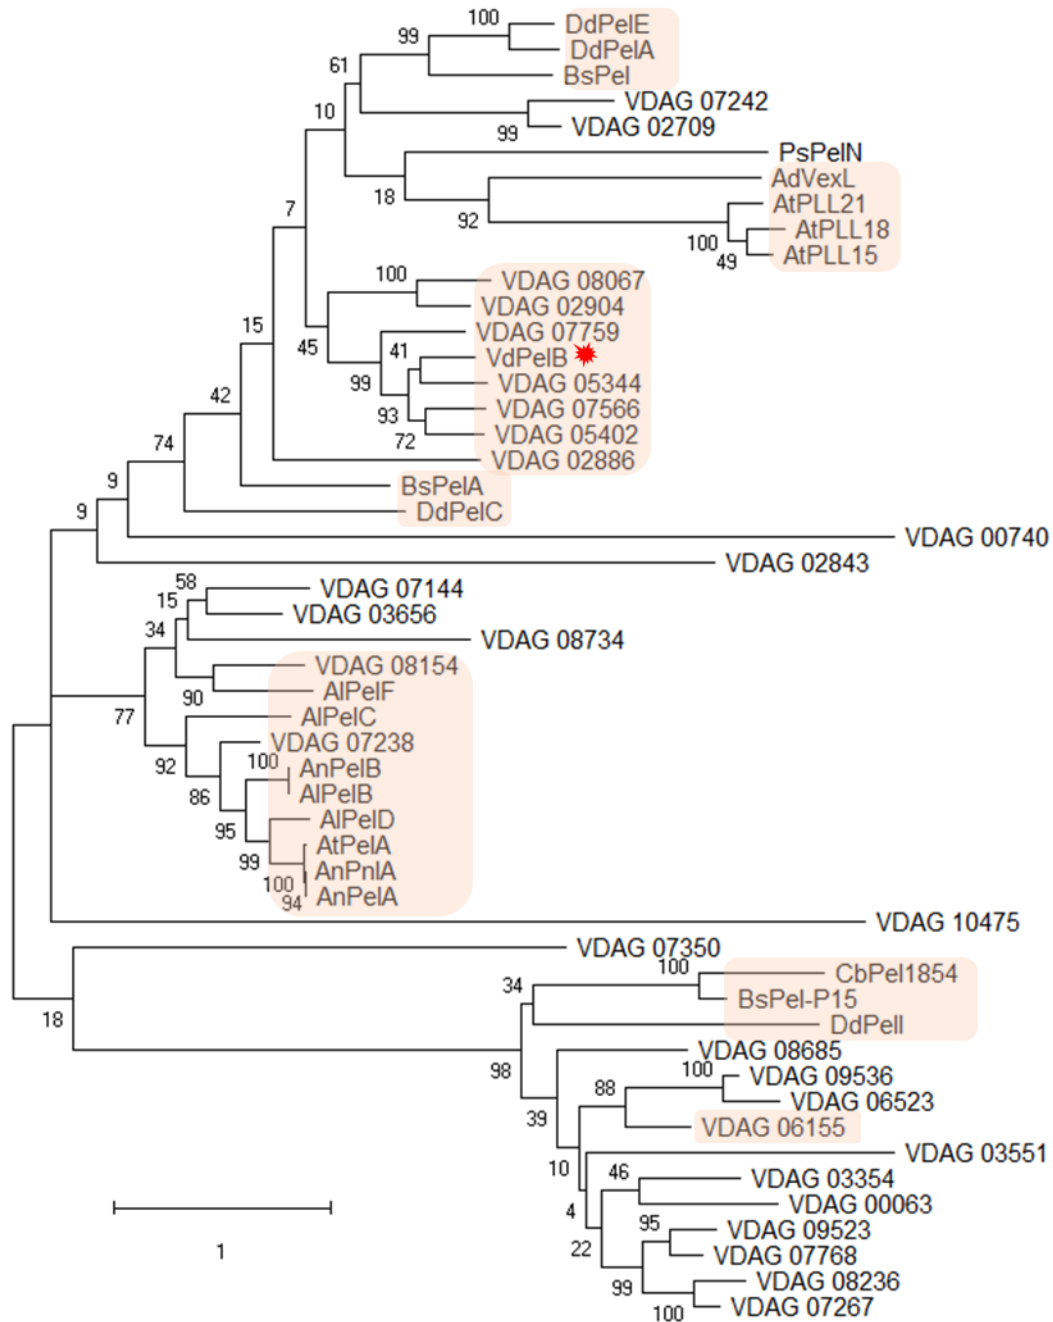

269

270 **Fig. 1. Phylogenetic analysis of *V. dahliae* VdPelB with selected PLLs**

271 Phylogenetic tree representing *V. dahliae* VdPelB (VDAG\_04718, G2X3Y1, red star) amino acid sequence in  
 272 comparison with PLLs from *Verticillium* [VDAG\_00740 (G2WQU8), VDAG\_02904 (G2WXC5), VDAG\_05344  
 273 (G2X628), VDAG\_07242 (G2XBA4), VDAG\_07759 (G2XC77), VDAG\_02709 (G2WWT0), VDAG\_02843  
 274 (G2WX64), VDAG\_02886 (G2WXA7), VDAG\_03656 (G2X1P5), VDAG\_05402 (G2X597), VDAG\_07144  
 275 (G2X9U9), VDAG\_07238 (G2XBA0), VDAG\_07566 (G2XBY8), VDAG\_08067 (G2XD35), VDAG\_08154  
 276 (G2XDC2), VDAG\_08734 (G2XF02), VDAG\_10475 (G2XJZ3), VDAG\_03354 (G2WZB2), VDAG\_03551  
 277 (G2WZV9), VDAG\_07267 (G2XBC9), VDAG\_07768 (G2XC86), VDAG\_08236 (G2XDK4), VDAG\_06155  
 278 (G2X8L4), VDAG\_06523 (G2X7R5), VDAG\_08685 (G2XEV0), VDAG\_09523 (G2XH91), VDAG\_09536  
 279 (G2XHA4), VDAG\_00063 (G2WR80), VDAG\_07350 (G2XGG7)], *Arabidopsis thaliana* [AtPLL15  
 280 (At5g63180), AtPLL18 (At3g27400), AtPLL21 (At5g48900)], *Dickeya dadanti* [DdPelA (P0C1A2), DdPelC

281 (P11073), DdPelE (P04960), DdPelI (O50325)], *Bacillus subtilis* [BsPel (P39116)], *Bacillus Sp.* KSM-P15  
282 [BsPel-P15 (Q9RHW0)], *Bacillus sp.* N16-5 [BsPelA (D0VP31)], *Aspergillus niger* AnPelA [(Q01172), AnPelB  
283 (Q00205), AnPn1A (A2R3I1)], *Achromobacter denitrificans* [AdVexL (A0A160EBC2)], *Aspergillus tubingensis*  
284 [AtPelA (A0A100IK89)], *Aspergillus luchuensis* [AlPelB (G7Y0I4)], *Acidovorax citrulli* [AcPel343, (A1TSQ3)],  
285 *Paenibacillus sp.* 0602 [PsPelN (W8CR80)], *Caldicellulosiruptor bescii* [CbPel1854 (B9MKT4)]. Maximum  
286 likelihood tree was constructed with 1000 bootstrap replicates. Most important clades are indicated in orange  
287 squares while VdPelB is marked by red star. Amino acids sequences were retrieved from Uniprot and TAIR.

### 288 **3.2. Cloning, expression and purification of VdPelB**

289 The *VdPelB* (*VDAG\_04718*) gene consists of 1 single exon of 1002 bp length. The coding  
290 sequence, minus the putative signal peptide was PCR-amplified using gene-specific primers,  
291 ligated in pPICZ $\alpha$ B vector and expressed in *P. pastoris* heterologous expression system,  
292 allowing its secretion in the culture media. Secreted VdPelB consisted of 343 aa, including the  
293 poly-histidine tag at the C-terminus used for affinity chromatography purification. After  
294 purification, VdPelB had an apparent molecular mass of ~38 kDa (**Fig. S1A**), higher than what  
295 was predicted on the basis of the amino acid sequence (33.8 kDa). However, this shift is likely  
296 to correspond to the tags (His and C-myc) and to the presence of 19 putative O-glycosylation  
297 sites, as predicted by NetOGlyc 4.0 Server.

### 298 **3.3. VdPelB has a right-handed parallel $\beta$ -helix fold**

299 VdPelB was crystallized and its 3D structure was determined using X-ray diffraction.  
300 VdPelB crystallized in monoclinic P 1 2<sub>1</sub> 1 asymmetric unit. Four data sets, collected from the  
301 same crystal at 1.2 Å resolution, were integrated, scaled and merged. There are two molecules  
302 in the asymmetric units: chains A and B are highly similar with a C $\alpha$  root mean square deviation  
303 (rmsd) value of 0.227 Å (**Fig. S2A**). The VdPelB structure consists of 298 amino acids (aa)  
304 with 18 aa at the N-terminus and 27 aa at the C-terminus that were not resolved because of poor  
305 electron densities, while overall electron densities were well defined. While no N-glycosylation  
306 sites could be revealed on the VdPelB structure, six O-glycosylation sites carrying mannose are  
307 visible for each molecule: T22, T44, T45, T46, S48 and T54, in accordance with the shift in  
308 size previously observed (**Fig. S2A**). During data acquisition no heating of the crystal was  
309 observed, as shown by low B factors and good occupancies (**Fig. S3A and B**). The final models'  
310 geometry, processing and refinement statistics are summarized (**Table 1**). VdPelB's structure  
311 has been deposited in the Protein Data Bank as entry 7BBV.

### 312 **Table 1. Data collection, processing and refinement for VdPelB**

| Characteristics                          | VdPeIB                  |
|------------------------------------------|-------------------------|
| <b>Data collection</b>                   |                         |
| Diffraction source                       | PROXIMA2                |
| Wavelength (Å)                           | 0.980                   |
| Temperature (°C)                         | 100.15                  |
| Detector                                 | DECTRIS EIGER X 9M      |
| Crystal-to-detector distance (mm)        | 115.02                  |
| Rotation range per image (°)             | 0.1                     |
| Total rotation range (°)                 | 360                     |
| <b>Crystal data</b>                      |                         |
| Space group                              | P1 21 1                 |
| <i>a</i> , <i>b</i> , <i>c</i> (Å)       | 60.89, 59.69, 93.87     |
| $\alpha$ , $\beta$ , $\gamma$ , (°)      | 90.00, 96.35, 90.00     |
| Subunits per asymmetric unit             | 2                       |
| <b>Data statistics</b>                   |                         |
| Resolution range (Å)                     | 60.52-1.2 (1.243 - 1.2) |
| Total No. of reflection                  | 8536161 (112943)        |
| No. of unique reflection                 | 207497 (19983)          |
| No. of reflections, test set             | 10362 (1003)            |
| R <sub>merge</sub> (%)                   | 0.1036 (4.709)          |
| Completeness (%)                         | 99.30 (96.11)           |
| ( <i>I</i> /σ( <i>I</i> ))               | 18.03 (0.22)            |
| Multiplicity                             | 41.1 (5.6)              |
| CC <sub>1/2</sub> (%)                    | 1 (0.116)               |
| <b>Refinement</b>                        |                         |
| R <sub>crys</sub> /R <sub>free</sub> (%) | 17.3 / 19.7             |
| Average B – factor (Å <sup>2</sup> )     | 33.18                   |
| No. of non-H atoms                       |                         |
| Protein                                  | 9097                    |
| Ion                                      | 2                       |
| Ligand                                   | 234                     |
| Water                                    | 1052                    |
| Total                                    | 10385                   |
| R.m.s. deviations                        |                         |
| Bonds (Å)                                | 0.013                   |
| Angles (°)                               | 1.39                    |
| Ramachandran plot                        |                         |
| Most favoured (%)                        | 95.1                    |
| Allowed (%)                              | 4.90                    |
| Outlier (%)                              | -                       |

314 VdPelB has a right-handed parallel  $\beta$ -helix fold which is common in pectinases [57].  
315 The  $\beta$ -helix is formed by three parallel  $\beta$ -sheets - PB1, PB2 and PB3 which contain 7, 10 and 8  
316  $\beta$ -strands, respectively. Turns connecting the PB1-PB2, PB2-PB3 and PB3-PB1  $\beta$ -sheets are  
317 named T1-turns, T2-turns and T3-turns, respectively, according to Yoder and Jurnak (**Fig. 2A**,  
318 **S4A and B**) [58]. T1-turns consist of 2-14 aa and builds the loop around the active site on the  
319 C-terminus. T2 turns mostly consist of 2 aa with Asn being one of the predominant aa, forming  
320 an N-ladder with the exception of an N245T mutation in VdPelB [15,20]. VdPelB has a  $\alpha$ -helix  
321 on N-terminus end that shields the hydrophobic core and is commonly conserved in PLs and  
322 PGs [15,59], while the C-terminus end is also protected by tail-like structure carrying one  $\alpha$ -  
323 helix. Interestingly N- and C- terminus tails pack against PB2 (**Fig. 2A**). There are only two  
324 Cys (C25 and C137) that do not form a disulphide bridge.

325 Sequence and structural alignments show that VdPelB belong to the PL1 family.  
326 VdPelB shares the highest structural similarity with BsPelA (PDB: 3VMV), with 30.06%  
327 sequence identity and  $C\alpha$  rmsd of 1.202 Å. The second-best structural alignment was with  
328 DdPelC (PDB: 1AIR) with 24.20% identity and  $C\alpha$  rmsd of 1.453 Å [41,60]. Both of these  
329 structures lack the long T3 loop described in *A.niger* pectate lyase (AnPelA, PDB: 1IDJ, **Fig.**  
330 **S2B and S5**) [15]. The putative active site is positioned between the T3 and T2 loops (**Fig. 2A**  
331 **and B**).

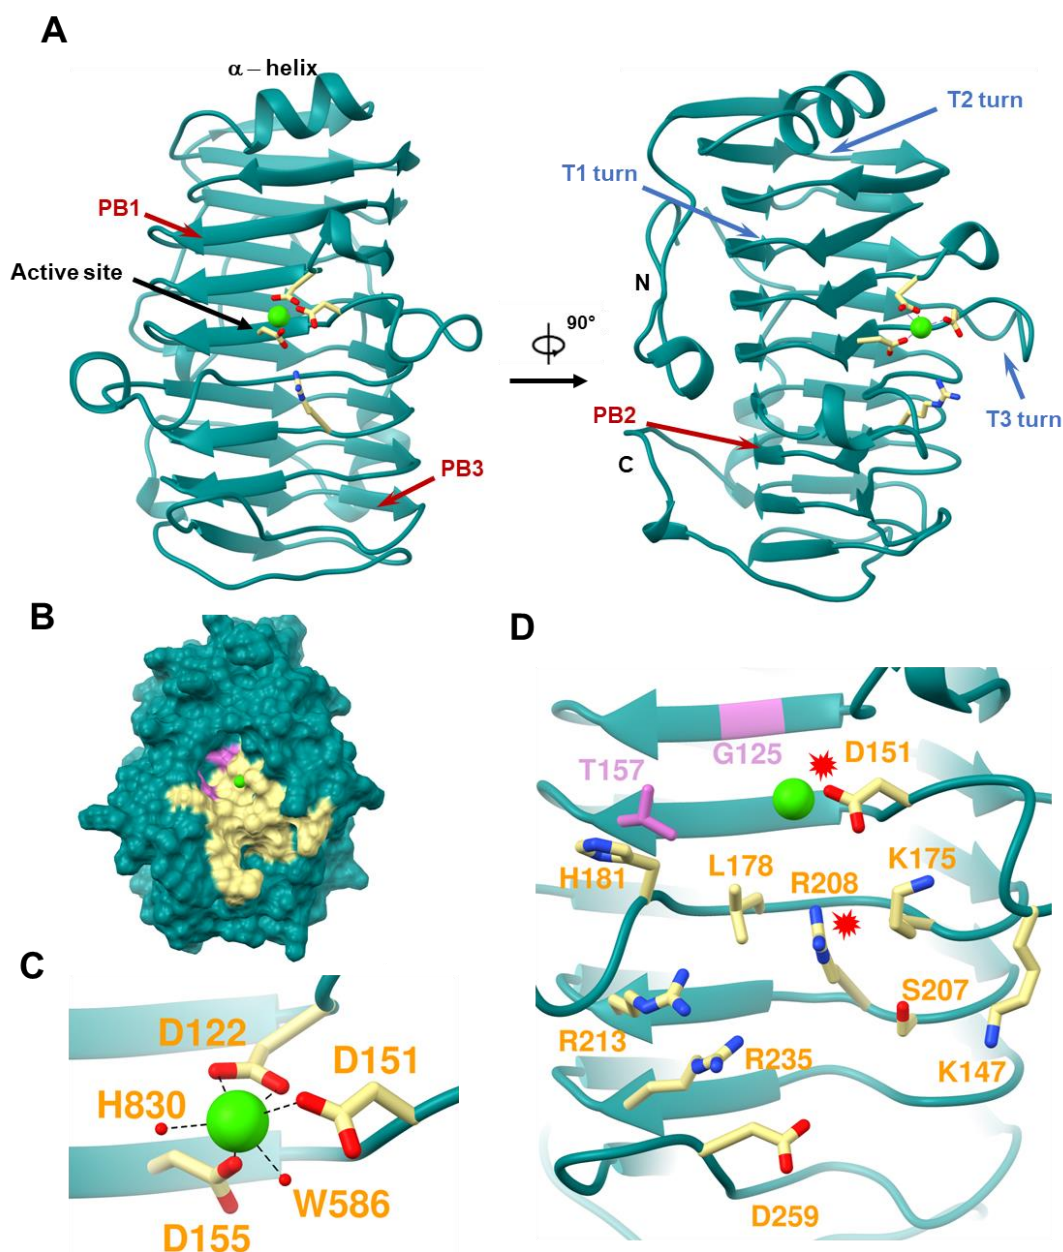

332

333 **Fig. 2. Structure determination of VdPelB**

334 A) Ribbon diagram of VdPelB crystalized in P1 21 1 space group. VdPelB is a right-handed parallel  $\beta$  helical  
 335 structure consisting of  $\beta$  strands (red arrows) and turns (blue arrows). VdPelB active site's aa are yellow-colored  
 336 while Ca atom is green. B) Surface representation of VdPelB binding groove. C) Active site of VdPelB  
 337 highlighting conserved aa and atoms interacting with Ca. D) Structure of VdPelB binding groove highlighting aa  
 338 involved in the interaction (yellow) and aa not of previously characterized in PLs (plum). Red stars indicates aa  
 339 from the active site.

#### 340 **3.4. Active site harbours $\text{Ca}^{2+}$ that is involved in catalysis**

341 The VdPelB active site is well conserved, harbouring strictly conserved acidic and basic  
 342 aa that are required for  $\text{Ca}^{2+}$  binding. Previously reported structures showed that two Asp (D122  
 343 and D155) and one Arg (R208) in VdPelB, are conserved, while D151 can be mutated to Glu,



344 or Arg in PNLs (**Fig. 2C and D**, Mayans et al., 1997). Other conserved aa in VdPelB include  
345 K175 and R213, with K175 being responsible for binding the carboxyl oxygen while R213  
346 hydrogen bonds to C-2 and C-3 of GalA (**Fig. 2D**) [29,61]. Mutating any of these aa leads to  
347 decreased enzyme activity [62]. In VdPelB, Ca<sup>2+</sup> ion is directly coordinated by D122, two  
348 carboxyl oxygen, D151, D155 and two water molecules (W568 and W830, **Fig. 2C**). In  
349 addition, mutation of D122T (VdPelB numbering) in BsPelA, is responsible for reduced affinity  
350 for Ca<sup>2+</sup> [41]. In the catalytic mechanism, Ca<sup>2+</sup> is directly involved in acidification of the proton  
351 absorption from C5 and elimination of group from C4, generating an unsaturated product. R208  
352 act as a base, similarly to the hydrolysis in the reaction mechanism of the GH28 family [63,64].

### 353 **3.5. Structural analysis of VdPelB suggests a PL activity mediated by peculiar** 354 **specificities**

355 The VdPelB binding groove comprises a number of basic and acidic aa including K147,  
356 D151, K175 L178, H181, S207, R208, R213 and R235 and D259 (**Fig. 2C and D**), that have  
357 previously been shown to be characteristics of PLs. This would suggest an enzyme activity on  
358 low DM pectins as aa positioned at the binding groove were indeed shown to differ between  
359 PNL and PL [15,21,24,29]. These aa are indeed mutated in Arg, Trp, Tyr, Gln and Gly in PNLs,  
360 which, by reducing their charge, would favour higher affinity for highly methylesterified  
361 pectins [15,29]. In VdPelB, as the T3 loop is missing, there are no equivalent to PNL specific  
362 W66, W81, W85, W151 aa (**Fig. S2B**, AnPelA numbering) and, moreover, W212 and W215  
363 are replaced by K175 and L178 in VdPelB. In BsPelA and DdPelC, these aa are replaced by  
364 K177/K190 and L180/L193, highlighting the high conservation of amino acids in  
365 VdPelB/BsPelA/DdPelC and subsequently in PLs. When a DP4 ligand from DdPelC crystal  
366 structure is superimposed to VdPelB, hydrogen bonds and van der Waals interactions are visible  
367 with the above-mentioned aa (**Fig. S6**) [15,21,29,41].

368 Interestingly, despite this rather conserved PL-related binding groove, VdPelB harbors,  
369 in the vicinity of the active site, G125 and T157 that are not present in the well characterized  
370 DdPelC [60]. At these positions, DdPelC, which was shown to be a *bona fide* PL with a high  
371 activity on polygalacturonic acid and alkaline pH with Ca<sup>2+</sup>-dependency, harbours Arg and Lys  
372 [15,61,65]. In that respect, the presence of G125 and T157 in VdPelB is similar to that identified  
373 in *Bacillus sp.* Pel-22, Pel-66, and Pel-90 and *Bacillus sp.* which showed activity on both PGA  
374 and high methylesterified pectins (**Fig. 2B and D**) [22,66,67]. The DdPelC aa being overall  
375 positively charged, could explain the binding preference towards non-methylesterified,  
376 negatively charged substrates in the vicinity of the active site. In contrast, considering the size

377 of Gly and Thr, they would sterically accommodate the increased size of methylesterified  
378 substrate. G125 and T157 could therefore account for a potential dual activity of VdPelB.  
379 Moreover, in previously characterized PLs and PNLs there is the presence of a small aa, Ser or  
380 Ala that replace H181. While H181 interacts directly with the substrate these aa do not provide  
381 this interaction instead the primary  $\text{Ca}^{2+}$  in the active site induce a substrate conformation that  
382 could be recognized by PLs [41]. Finally, L178 is positioned in-between the catalytic  $\text{Ca}^{2+}$  and  
383 R208 and is involved in substrate binding making it a perfect candidate to assess its importance  
384 (**Fig. 2D**).

### 385 **3.6. Molecular dynamic simulations show higher dynamics of VdPelB in complex with** 386 **methylesterified substrates**

387 To determine how the structure of VdPelB and the observed differences in amino-acidic  
388 composition might influence the affinity with differently methylated substrates, we performed  
389 MD simulations on VdPelB in complex with either a non-methylesterified or fully  
390 methylesterified deca-saccharides, which are able to occupy the entire binding groove (**Fig. 3**).  
391 MD simulations show substantially differential dynamic profiles for oligosaccharides with and  
392 without methylesterification. Expectedly, the dynamics is lowest in proximity of the catalytic  
393 subsite (+1) and increases consistently towards both the reducing and non-reducing ends of the  
394 substrate: with the highest dynamics found at the non-reducing end (**Fig. 3A**).

395 A quantitative estimation of the substrate dynamics was obtained by monitoring the root  
396 square mean fluctuations (RMSF) of each sugar residue and shows that a polygalacturonate  
397 substrate associates more stably in the subsites of the binding groove placed towards the sugar's  
398 reducing end (subsites -1 to -5), with differences between methylesterified and non-  
399 methylesterified substrates approaching the obtained standard deviation. In some cases, the  
400 dynamics reversed for non-methylesterified sugars, with a higher RMSF for de-methylesterified  
401 sugars towards the saccharide's reducing end (**Fig. 3B**). Moreover, and in line with an observed  
402 positively charged binding groove, non-methylesterified substrates retain a higher number of  
403 contacts than methylesterified sugars, with salt-bridges contributing the most to the observed  
404 differences (**Fig. 3C**).

405 We then additionally and specifically focused on the analysis of the interactions made by  
406 T157, which is nested with the -2 subsite of the binding groove. Simulations sample consistently  
407 higher contacts formation between a methylesterified sugar docked in subsite -2 and T157, with  
408 distances shifted to lower values when compared to a non-methylesterified sugar (**Fig. 3D**),

409 even the RMSF of non-methylesterified monosaccharides docked in subsite -2 experience on  
 410 average, significantly lower dynamics. Altogether, the formation of a larger number of contacts  
 411 between methylesterified saccharides docked in the -2 subsite suggests an active role of T157  
 412 in the binding of methylesterified chains: with the butanoic moiety of T157 engaging in  
 413 hydrophobic interactions with the methyl-ester presented by methylesterified sugar units (**Fig.**  
 414 **3E**). While T157 is seen to have an active role in engaging with the substrate's hydrophobic  
 415 moieties, an active role of G125, also in the same subsite, was not observed but it is plausible  
 416 that the minimal size of G125 would increase the accommodability of methylesterified sugars  
 417 in that position.

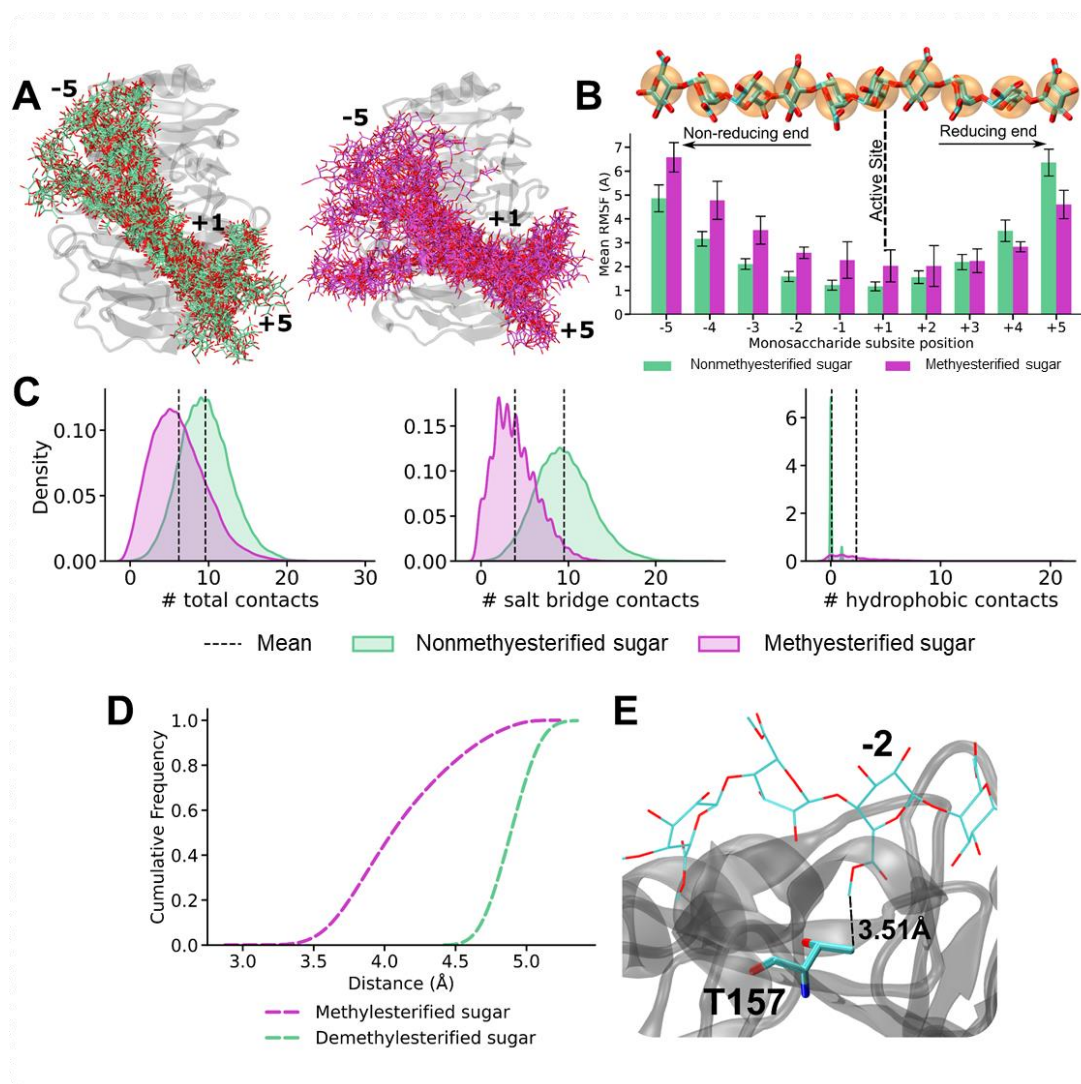

418  
 419 **Fig. 3. VdPelB substrate dynamics in complex with fully de-methylesterified and methylesterified complex**  
 420 A) Ensembles of non-methylesterified (green, left panel) and methylesterified (pink, right panel) HG  
 421 deca-saccharide at every 100 frames for the simulated VdPelB complexes. Substrate within the enzymes' binding  
 422 grooves are labelled from -5 (HG-non-reducing end) to +5 (HG-reducing end) B) RMSF of non-methylesterified

423 (green) and methylesterified (pink) HG bound across the binding groove of VdPelB. Numbers indicate the beta  
424 sheet position from the active site. C) Analysis of the contacts between VdPelB and non-methylesterified (green)  
425 and methylesterified substrate (pink). D) Distance between T157K residue and the substrate residues plotted as  
426 cumulative frequency. E) T157 hydrophobic interaction with methyl-ester of methylesterified substrate.

### 427 **3.7. Biochemical characterization of VdPelB**

428 We first determined the activity of VdPelB by following the release of 4,5-unsaturated  
429 bonds which can be detected at 235 nm using UV spectrophotometer. VdPelB activity was first  
430 tested for its dependency towards  $\text{Ca}^{2+}$ . Using a standard PL assay, with PGA as a substrate, an  
431 increase in the VdPelB activity was measured in presence of calcium. In contrast in presence  
432 of EDTA, used as a chelating agent, no activity was detected, confirming the calcium-dependent  
433 activity of the enzyme (**Fig. S7A**) [15]. Activity measured in absence of added  $\text{CaCl}_2$  reflects  
434 the presence of calcium from the culture media that is bound to VdPelB during production, and  
435 previously identified in the 3D structure. We tested the effects of increasing  $\text{CaCl}_2$   
436 concentrations and showed that the maximum activity was already reached when using as low  
437 as  $0.125 \mu\text{M}$  (**Fig. S7B**). To test the substrate-dependence of VdPelB, four substrates of  
438 increasing degrees of methyl-esterification were used. VdPelB showed the highest activity on  
439 PGA, with less than 10% of the maximum activity measured on the three others substrates (**Fig.**  
440 **4A**). This shows that, as inferred from above-mentioned structural and dynamical data, VdPelB  
441 act mainly as a PL although it can still show residual activity on high DM pectins. Considering  
442 this, PGA was used as substrate to test the pH-dependence of the enzyme's activity in sodium  
443 acetate and Tris-HCl buffers (**Fig. 4A**). VdPelB was most active at pH 8, with only a slight  
444 decrease in activity at pH 9 (93%). In contrast, the relative activity at pH 5-7 was close to null.  
445 The pH optimum for VdPelB was the same as *B. fuckeliana* Pel (pH 8) [68], close to that  
446 reported for *D. dadantii* PelN (pH 7.4) [69], but was lower to that measured for *B. clausii* Pel  
447 (pH 10.5) [70]. In contrast, the pH optimum was higher compared to five PNLs from  
448 *Aspergillus* sp. AaPelA (pH 6.1), AtPelA (pH 4.5), AtPelA (pH 6.4), AtPelD (pH 4.3) [18] and  
449 *A. parasiticus* Pel (pH 4) [19]. The optimum temperature assay showed that VdPelB was most  
450 active at  $35^\circ\text{C}$  (**Fig. S8**). VdPelB appeared less heat-tolerant as compared to thermophilic PLLs  
451 reported from *Bacillus* sp. RN1  $90^\circ\text{C}$  [71], *B. clausii* Pel,  $70^\circ\text{C}$  [70], *B. subtilis* Pel168,  $50^\circ\text{C}$   
452 [72]. However, its optimum temperature is in the range of that measured for *X. campestris* Pel  
453 [73] and cold-active Pel11 from *M. eurypsychrophila* [74]. The lack of disulphide bridges  
454 previously shown in the structure could be responsible for the lower stability of the enzyme at  
455 high temperatures, in comparison with previously characterized PLs [75].

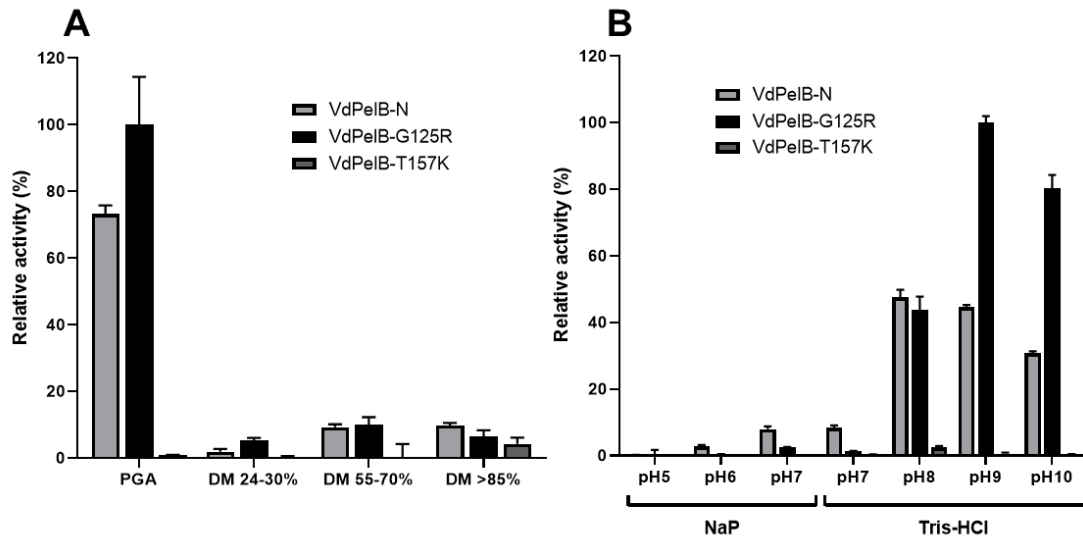

456

457 **Fig. 4. Biochemical characterization of VdPelB**

458 A) Substrate-dependence of VdPelB-N, G125R and T157K. The activities were measured after 12 min of  
459 incubation with PGA, pectins DM 24-30%, DM 55-70%, DM>85% with addition of Ca<sup>2+</sup> at 35°C. B) pH-  
460 dependence of VdPelB-N, G125R and T157K activity. The activities were measured after 12 min of incubation  
461 with PGA in sodium phosphate (NaP) and Tris-HCl buffer at 35°C. Values correspond to means ± SE of three  
462 replicates.

### 463 3.8. Mutation of specific amino-acids affects VdPelB activity

464 Considering the fine structure of VdPelB structural we generated mutated forms of the  
465 enzymes for five amino acids that likely to be involved in the catalytic mechanism and/or  
466 substrate binding: G125R, D151R, T157K, L178K and H181A. Enzymes were produced in *P.*  
467 *pastoris* and purified (**Fig. S1B**). If the importance of some of these aa (i.e. D151 and H181) in  
468 the catalytic mechanism was previously shown for others PL [41,76], our study highlights the  
469 key role of some novel aa in the catalytic mechanism. The activities of mutants were tested at  
470 iso-quantities of wild-type enzyme. Surprisingly, the G125R mutant was 25% more active on  
471 PGA compared to the native enzyme and a shift in the optimum pH was observed (**Fig. 4A**).  
472 While native enzyme was most active at pH8 with slight decrease in activity at pH9, the activity  
473 of G125R mutant was increased by circa 50% at pH9 and pH10 (**Fig. 4B**). Both enzymes kept  
474 the same activity at pH8. The substitution of Gly with Arg, present in a number of previously  
475 characterized PL could facilitate the interaction with the substrate and basification of the active  
476 site thanks to its physio-chemical properties [60]. The activity of T157K was closed to null  
477 when tested on PGA and different pHs. The introduction of a Lys, a chemically different and  
478 larger aa is likely to introduce steric clashes notably with H181 and L178 that are important for  
479 the activity. The H181A mutant lost much of its activity as there are less interaction/recognition



480 with the substrate. No activity for D151R and L178K mutants were observed in line with the  
481 fact that D151 is an active site aa that binds the  $\text{Ca}^{2+}$ . Mutation of this amino-acid is negatively  
482 impairing the functioning of the enzyme (**Fig. S7A and B**) [41,76]. We can hypothesize that  
483 L178K mutation positioned in between  $\text{Ca}^{2+}$ , R208 and the substrate, induces specific substrate  
484 conformation that diminishes the direct interaction between the enzyme catalytic centre and the  
485 substrate, which translates to loss of activity (**Fig. S9**).

### 486 **3.9. Identification of the OGs released by VdPelB from commercial and cell wall** 487 **pectins**

488 To further understand the specificity of VdPelB on different substrates, we performed  
489 LC-ESI-MS/MS to determine the profiles of digestion products (OGs) and to compare with that  
490 of commercially available *Aspergillus sp.* Pel (AsPel, **Fig. S10**). To be fully comparable,  
491 digestions were realized, for each substrate, at iso-activities for the two enzymes. On the basis  
492 of digestion profiles, we identified 48 OGs and created a dedicated library that was used for  
493 identification and integration of peaks (**Table 2**). MS<sup>2</sup> fragmentation allowed determining the  
494 structure of some of the OGs (**Fig. S11 and S12**). The OGs released by either of the enzymes  
495 were mainly corresponded to 4,5-unsaturated OGs, which is in accordance with  $\beta$ -eliminating  
496 action of PLLs. When using pectins DM 20-34% and at low enzyme's concentration (VdPelB-  
497 2), VdPelB mainly released non-methylesterified OGs of high DP (GalA<sub>5</sub>, GalA<sub>6</sub>, GalA<sub>7</sub>,  
498 GalA<sub>8</sub>, GalA<sub>9</sub>, GalA<sub>10</sub>) that were subsequently hydrolysed when using more concentrated  
499 VdPelB (VdPelB-1, **Fig. 5A**). These digestion products strikingly differed to that generated by  
500 AsPel, that are methylesterified OGs of higher DP (GalA<sub>4</sub>Me<sub>1</sub>, GalA<sub>4</sub>Me<sub>2</sub>, GalA<sub>5</sub>Me<sub>1</sub>,  
501 GalA<sub>6</sub>Me<sub>2</sub>, GalA<sub>11</sub>Me<sub>3</sub>...), thus showing distinct enzymatic specificities. Altogether, these first  
502 results unequivocally shows VdPelB act as an endo-PL, and that its processivity differ to that  
503 of AsPel, which act as well as an endo-PL [9]. When using sugar beet pectins, that are known  
504 to be highly acetylated (DM 42%, DA 31%), VdPelB released acetylated OGs (GalA<sub>2</sub>Ac<sub>2</sub>,  
505 GalA<sub>3</sub>Ac<sub>1</sub>, GalA<sub>4</sub>Ac<sub>1</sub>, GalA<sub>5</sub>Ac<sub>1</sub>), while AsPel showed much lower activity and relative  
506 abundance of these OGs (**Fig. 5B**). Previous reports have shown that differences exist between  
507 PNL, in particular with regards to acetyl substitutions [18]. In contrast, AsPelI released mainly  
508 methylesterified OGs (GalA<sub>6</sub>Me<sub>1</sub>, GalA<sub>8</sub>Me<sub>1</sub>, GalA<sub>10</sub>Me<sub>3</sub>...).

#### 509 **Table 2. List of oligogalacturonides identified by LC-MS/MS analysis.**

510 For each OG, elemental composition, retention time (RT) and ion mass used for the analysis are highlighted. In  
511 the case of detection of mono and di-charged OGs, the *italicized* and **BOLD** mass, corresponding to the more  
512 intense ion, were used for the quantification. \* indicates non-unsaturated OGs.



| Name      | Elemental composition | RT (min) | [M-H]-             | [M-2H]2-           |
|-----------|-----------------------|----------|--------------------|--------------------|
| GalA1*    | C6H10O7               | 9.3      | 193.0353763        |                    |
| GalA1Ac2  | C10H12O8              | 9.1      | 259.045941         |                    |
| GalA2*    | C12H18O13             | 8.88     | 369.0674644        |                    |
| GalA2     | C12H16O12             | 8.95     | 351.0568997        |                    |
| GalA2Ac2  | C16H20O14             | 8.67     | 435.0780291        |                    |
| GalA2Me1* | C13H20O13             | 8.85     | 383.0831145        |                    |
| GalA2Me1  | C13H18O12             | 8.92     | 365.0725498        |                    |
| GalA3*    | C18H26O19             | 8.56     | 545.0995525        |                    |
| GalA3     | C18H24O18             | 8.61     | 527.0889878        |                    |
| GalA3Ac1  | C20H26O19             | 8.59     | 569.0995525        |                    |
| GalA3Me1  | C19H26O18             | 8.56     | 541.1046379        |                    |
| GalA3Me2* | C20H30O19             | 8.62     | 573.1308527        |                    |
| GalA4*    | C24H34O25             | 8.27     | 721.1316406        |                    |
| GalA4     | C24H32O24             | 8.33     | <b>703.1210759</b> | 351.0568997        |
| GalA4Ac1  | C26H34O25             | 8.31     | 745.1316406        |                    |
| GalA4Me1* | C25H36O25             | 8.37     | 735.1472907        |                    |
| GalA4Me1  | C25H34O24             | 8.32     | <b>717.136726</b>  | 358.0647248        |
| GalA4Me2  | C26H36O24             | 8.3      | 731.1523761        |                    |
| GalA5*    | C30H42O31             | 8.04     | 897.1637287        |                    |
| GalA5     | C30H40O30             | 8.09     | <b>879.153164</b>  | 439.0729438        |
| GalA5Ac1  | C32H42O31             | 8.09     | 921.1637287        |                    |
| GalA5Me1* | C31H44O31             | 8.11     | <b>911.1793788</b> | 455.0860512        |
| GalA5Me1  | C31H42O30             | 8.13     | <b>893.1688141</b> | 446.0807688        |
| GalA5Me2* | C32H46O31             | 8.13     | 925.1950289        |                    |
| GalA5Me2  | C32H44O30             | 8.03     | 907.1844642        | <b>453.0885939</b> |
| GalA6*    | C36H50O37             | 7.84     |                    | 536.0942702        |
| GalA6     | C36H48O36             | 7.82     | 1055.185252        | <b>527.0889878</b> |
| GalA6Me1  | C37H50O36             | 7.92     | 1069.200902        | <b>534.0968129</b> |
| GalA6Me2  | C38H52O36             | 7.83     | 1083.216552        | <b>541.1046379</b> |
| GalA7*    | C42H58O43             | 7.65     |                    | 624.1103142        |
| GalA7     | C42H56O42             | 7.62     | 1231.21734         | <b>615.1050318</b> |
| GalA7Me1  | C43H58O42             | 7.72     | 1245.23299         | <b>622.1128569</b> |
| GalA7Me2* | C44H62O43             | 7.75     |                    | 638.1259643        |
| GalA7Me2  | C44H60O42             | 7.72     | 1259.24864         | <b>629.1206819</b> |
| GalA8     | C48H64O48             | 7.45     |                    | 703.1210759        |
| GalA8Me1* | C49H68O49             | 7.53     |                    | 719.1341833        |
| GalA8Me1  | C49H66O48             | 7.52     | 1421.265078        | <b>710.1289009</b> |
| GalA8Me2* | C50H70O49             | 7.55     |                    | 726.1420083        |
| GalA8Me2  | C50H68O48             | 7.58     | 1435.280728        | <b>717.136726</b>  |

| Name       | Elemental composition | RT (min) | [M-H]- | [M-2H]2-    |
|------------|-----------------------|----------|--------|-------------|
| GalA9*     | C54H74O55             | 7.29     |        | 800.1424023 |
| GalA9      | C54H72O54             | 7.3      |        | 791.1371199 |
| GalA9Me1   | C55H74O54             | 7.34     |        | 798.144945  |
| GalA9Me2   | C56H76O54             | 7.37     |        | 805.15277   |
| GalA9Me2   | C56H76O54             | 7.41     |        | 805.15277   |
| GalA9Me3   | C57H78O54             | 7.45     |        | 812.1605951 |
| GalA10     | C60H80O60             | 7.15     |        | 879.153164  |
| GalA10Ac1  | C62H82O61             | 7.29     |        | 900.1584463 |
| GalA10Me1  | C61H82O60             | 7.19     |        | 886.160989  |
| GalA10Me2* | C62H86O61             | 7.24     |        | 902.1740964 |
| GalA10Me2  | C62H84O60             | 7.24     |        | 893.1688141 |
| GalA10Me3  | C63H86O60             | 7.3      |        | 900.1766391 |
| GalA11     | C66H88O66             | 7.03     |        | 967.169208  |
| GalA11Ac1  | C68H90O67             | 7.14     |        | 988.1744904 |
| GalA11Me1  | C67H90O66             | 7.06     |        | 974.1770331 |
| GalA11Me2  | C68H92O66             | 7.09     |        | 981.1848581 |
| GalA11Me3  | C69H94O66             | 7.14     |        | 988.1926832 |
| GalA12Me2  | C74H100O72            | 6.96     |        | 1069.200902 |
| GalA12Me3  | C75H102O72            | 6.99     |        | 1076.208727 |
| GalA12Me4  | C76H104O72            | 7.0419   |        | 1083.216552 |
| GalA13Me2  | C80H108O78            | 6.82     |        | 1157.216946 |
| GalA13Me3  | C81H110O78            | 6.86     |        | 1164.224771 |
| GalA13Me4  | C82H112O78            | 6.9      |        | 1171.232596 |
| GalA14Me3  | C87H118O84            | 6.73     |        | 1252.240815 |
| GalA14Me4  | C88H120O84            | 6.77     |        | 1259.24864  |
| GalA15Me5  | C95H130O90            | 6.69     |        | 1354.272509 |

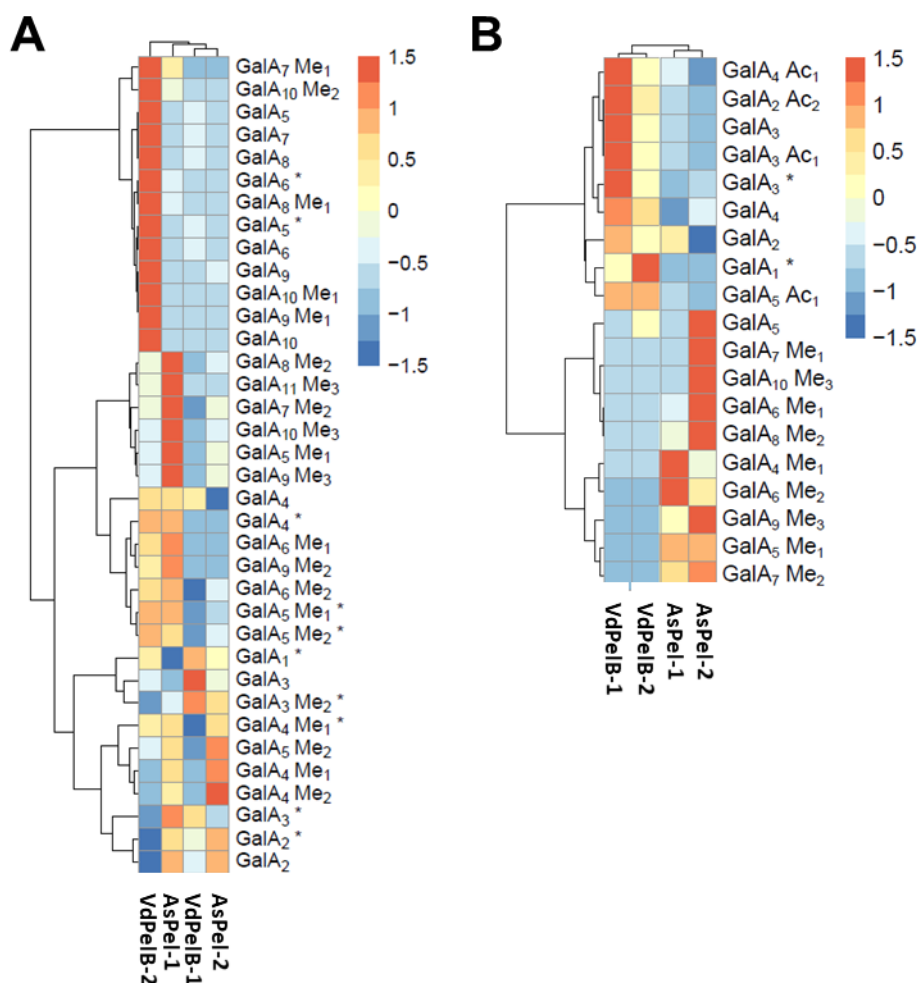

515

516 **Fig. 5. Analysis of OGs produced by the action of VdPelB and AsPeI on pectins of various degrees of**  
 517 **methylesterification and acetylation**

518 OGs were separated by SEC and analysed by MS/MS. A) Pectins DM 24-30%. B) Sugar beet pectins (DM 42%  
 519 DA 31%). Substrates were digested overnight at 40°C and pH 8 using isoactivities of VdPelB and AsPeI. Enzyme  
 520 concentrations are stated in Table S2. Subscript numbers indicate the DP, DM and DA. \* indicate non-unsaturated  
 521 OGs. Values correspond to means of three replicates.

522 *V. dahliae* and closely related fungus from the same genus are known flax pathogens,  
 523 where they use their enzymatic arsenal, that includes pectin degrading enzymes, for penetrating  
 524 the host cell leading to infection [30]. To assess the potential role of VdPelB in flax  
 525 pathogenicity we digested root cell walls from two flax cultivars, Evea (Verticillium-partially  
 526 resistant), and Violin (Verticillium-susceptible), and we compared the OGs released. On root  
 527 cell walls, VdPelB released mainly unsaturated OGs up to DP5 (**Fig. 6**). From similar starting  
 528 root material, the OG total peak area detected was five times lower for Evea compared to Violin,  
 529 suggesting that it is less susceptible to digestion by VdPelB. OGs released by VdPelB were  
 530 mainly non-methylesterified but could be acetylated (GalA<sub>2</sub>, GalA<sub>3</sub>, GalA<sub>3</sub>Ac<sub>1</sub>, GalA<sub>4</sub>,

531 GalA<sub>4</sub>Ac<sub>1</sub> GalA<sub>5</sub>, GalA<sub>5</sub>Ac<sub>1</sub>), and the abundance of GalA<sub>3</sub> and GalA<sub>4</sub> was five and fifteen times  
532 higher in Violin, respectively. These data together with that obtained from sugar beet pectins  
533 strongly suggests that VdPelB preference is for non-methylesterified and acetylated substrates.  
534 Our data suggest that cell wall structure differ between the two cultivars and that VdPelB could  
535 determine *Verticillium* pathogenicity thanks to a better degradation of the cell wall pectins of  
536 sensitive cultivars [35]. Similarly, VdPel1 was previously identified as virulence factor, where  
537 the deletion of this gene decreased virulence in tobacco, as compared with the wild-type  
538 *Verticillium* [33].

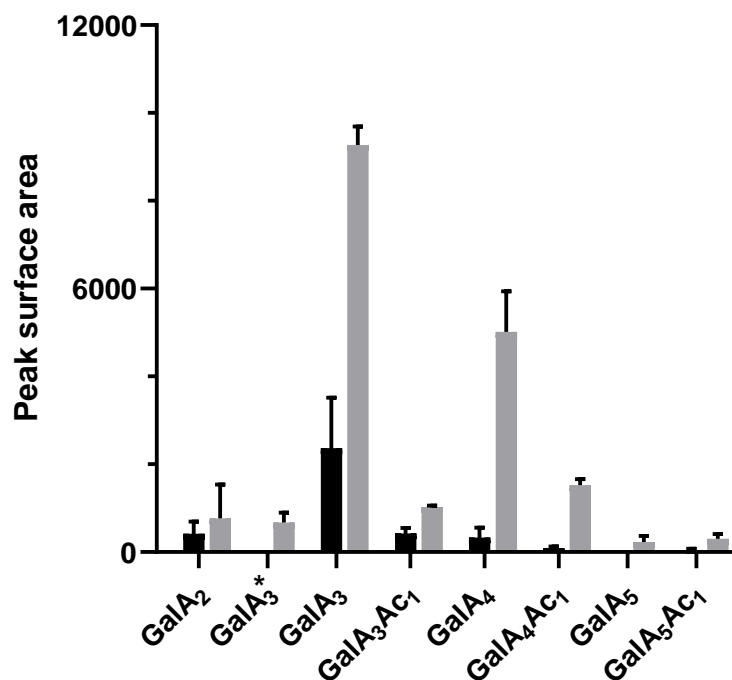

539

540 **Fig. 6. Analysis of OGs released by VdPelB from flax roots.**

541 VdPelB was incubated overnight with roots from Évéa (spring flax, partially resistant to *Verticillium* wilt, black)  
542 and Violin (winter flax, more susceptible to *Verticillium* wilt, grey). Values correspond to means  $\pm$  SE of three  
543 replicates. Subscript numbers indicate the DP, DM and DA.

544

#### 545 **4. Conclusion**

546 We have fully characterized, by multidisciplinary approaches, a novel pectinolytic  
547 enzyme from *V.dahliae*, VdPelB, that belongs to the PLL family. The protein was crystallised  
548 and its 3D structure determined at a high resolution. VdPelB showed a conserved structure,

549 with typical topology for PLs and the active site harboured three conserved Asp coordinating  
550  $\text{Ca}^{2+}$  and Arg involved in the  $\beta$ -elimination mechanism. The binding groove of VdPelB showed  
551 conserved aa that are characteristic of PLs, with MD simulations confirming the lower  
552 dynamics/higher affinity of the enzyme towards non-methylesterified pectins. As inferred from  
553 structural and dynamical analyses, VdPelB showed high activity on non-methylesterified  
554 substrates, with a maximum activity at pH 8 and 35°C. The analysis of the structure led the  
555 identification, in the VdPelB, of peculiar aa that are normally present in PNL. In particular,  
556 G125R mutant showed increased activity on PGA and switch in pH optimum from 8 to 9. The  
557 analysis of the digestion products of showed that VdPelB act as an endo enzyme and that it can  
558 release a large diversity of OGs with a preference for non-methylesterified and acetylated  
559 products. The OGs generated by VdPelB from *Verticillium*-partially tolerant and *Verticillium*-  
560 sensitive flax cultivars showed that the enzyme could be a determinant of pathogenicity, as a  
561 function of pectins' structure.

562

563 **Funding sources**

564 This work was supported by the Conseil Regional Hauts-de-France and the FEDER  
565 (Fonds européen de développement régional) through a PhD grant awarded to J.S.

566

567 **Acknowledgements**

568 We wish to thank Sylvain Lecomte and Mehdi Cherkaoui for providing the *Verticillium*  
569 *dahliae* DNA, Martin Savko and the staff at Proxima 2a beamline (Synchrotron SOLEIL, Gif  
570 sur Yvette, France) for X-ray diffraction and data collection.

571 **Author's contribution**

572 **Josip Safran**: Conceptualization, Data curation, Formal analysis, Investigation, Methodology,  
573 Writing - original draft. **Vanessa Ung**: Data curation, Investigation, Methodology. **Julie**  
574 **Bouckaert**: Data curation, Investigation, Methodology. **Olivier Habrylo**: Formal analysis,  
575 Investigation, Methodology. **Roland Molinié**: Data curation, Formal analysis, Investigation,  
576 Methodology. **Jean-Xavier Fontaine**: Data curation, Formal analysis, Investigation,  
577 Methodology. **Adrien Lemaire**: Investigation, Methodology. **Aline Voxeur**: Investigation,  
578 Methodology. **Serge Pilard**: Investigation, Methodology. **Corinne Pau-Roblot**  
579 Conceptualization, Methodology. **Davide Mercadante**: Data curation, Methodology, Writing  
580 - review & editing. **Jérôme Pelloux**: Funding acquisition, Conceptualization, Writing - review  
581 & editing. **Fabien Sénéchal**: Conceptualization, Writing - review & editing.

582 **Conflicts of interest**

583 There are no conflicts of interest.

584



585 **References**

- 586 [1] B.L. Ridley, M.A. O'Neill, D. Mohnen, Pectins: structure, biosynthesis, and  
587 oligogalacturonide-related signaling, *Phytochemistry*. 57 (2001) 929–967.  
588 [https://doi.org/10.1016/S0031-9422\(01\)00113-3](https://doi.org/10.1016/S0031-9422(01)00113-3).
- 589 [2] D. Mohnen, Pectin structure and biosynthesis, *Curr. Opin. Plant Biol.* 11 (2008) 266–  
590 277. <https://doi.org/10.1016/j.pbi.2008.03.006>.
- 591 [3] M.A. Atmodjo, Z. Hao, D. Mohnen, Evolving views of pectin biosynthesis, *Annu. Rev.*  
592 *Plant Biol.* 64 (2013) 747–779. [https://doi.org/10.1146/annurev-arplant-042811-](https://doi.org/10.1146/annurev-arplant-042811-105534)  
593 105534.
- 594 [4] Y. Rui, C. Xiao, H. Yi, B. Kandemir, J.Z. Wang, V.M. Puri, C.T. Anderson,  
595 POLYGALACTURONASE INVOLVED IN EXPANSION3 functions in seedling  
596 development, rosette growth, and stomatal dynamics in *Arabidopsis thaliana*, *Plant*  
597 *Cell*. 29 (2017) 2413–2432. <https://doi.org/10.1105/tpc.17.00568>.
- 598 [5] C. Xiao, C. Somerville, C.T. Anderson, POLYGALACTURONASE INVOLVED IN  
599 EXPANSION1 functions in cell elongation and flower development in *Arabidopsis*,  
600 *Plant Cell*. 26 (2014) 1018–1035. <https://doi.org/10.1105/tpc.114.123968>.
- 601 [6] J. Pelloux, C. Rustérucci, E.J. Mellerowicz, New insights into pectin methylesterase  
602 structure and function, *Trends Plant Sci.* 12 (2007) 267–277.  
603 <https://doi.org/10.1016/j.tplants.2007.04.001>.
- 604 [7] F. Sénéchal, A. Mareck, P. Marcelo, P. Lerouge, J. Pelloux, *Arabidopsis* PME17  
605 Activity can be Controlled by Pectin Methylesterase Inhibitor4, *Plant Signal. Behav.* 10  
606 (2015) e983351. <https://doi.org/10.4161/15592324.2014.983351>.
- 607 [8] V.S. Nocker, L. Sun, Analysis of promoter activity of members of the Pectate lyase-  
608 like(PLL) gene family in cell separation in *Arabidopsis*, *BMC Plant Biol.* 10 (2010)  
609 152. <https://doi.org/10.1186/1471-2229-10-152>.
- 610 [9] A. Voxeur, O. Habrylo, S. Guénin, F. Miart, M.C. Soulié, C. Rihouey, C. Pau-Roblot,  
611 J.M. Domon, L. Gutierrez, J. Pelloux, G. Mouille, M. Fagard, H. Höfte, S. Vernhettes,  
612 Oligogalacturonide production upon *Arabidopsis thaliana*-*Botrytis cinerea* interaction,  
613 *Proc. Natl. Acad. Sci. U. S. A.* 116 (2019) 19743–19752.  
614 <https://doi.org/10.1073/pnas.1900317116>.

- 615 [10] I. Kars, G.H. Krooshof, L. Wagemakers, R. Joosten, J.A.E. Benen, J.A.L. Van Kan,  
616 Necrotizing activity of five *Botrytis cinerea* endopolygalacturonases produced in *Pichia*  
617 *pastoris*, *Plant J.* 43 (2005) 213–225. [https://doi.org/10.1111/j.1365-](https://doi.org/10.1111/j.1365-313X.2005.02436.x)  
618 313X.2005.02436.x.
- 619 [11] R.P. Jolie, T. Duvetter, A.M. Van Loey, M.E. Hendrickx, Pectin methylesterase and its  
620 proteinaceous inhibitor: A review, *Carbohydr. Res.* 345 (2010) 2583–2595.  
621 <https://doi.org/10.1016/j.carres.2010.10.002>.
- 622 [12] R.S. Jayani, S. Saxena, R. Gupta, Microbial pectinolytic enzymes: A review, *Process*  
623 *Biochem.* 40 (2005) 2931–2944. <https://doi.org/10.1016/j.procbio.2005.03.026>.
- 624 [13] H. Suzuki, T. Morishima, A. Handa, H. Tsukagoshi, M. Kato, M. Shimizu,  
625 Biochemical Characterization of a Pectate Lyase AnPL9 from *Aspergillus nidulans*,  
626 *Appl. Biochem. Biotechnol.* (2022). <https://doi.org/10.1007/s12010-022-04036-x>.
- 627 [14] G. Limberg, R. Körner, H.C. Buchholt, T.M.I.E. Christensen, P. Roepstorff, J.D.  
628 Mikkelsen, Analysis of different de-esterification mechanisms for pectin by enzymatic  
629 fingerprinting using endopectin lyase and endopolygalacturonase II from *A. Niger*,  
630 *Carbohydr. Res.* 327 (2000) 293–307. [https://doi.org/10.1016/S0008-6215\(00\)00067-7](https://doi.org/10.1016/S0008-6215(00)00067-7).
- 631 [15] O. Mayans, M. Scott, I. Connerton, T. Gravesen, J. Benen, J. Visser, R. Pickersgill, J.  
632 Jenkins, Two crystal structures of pectin lyase A from *Aspergillus* reveal a pH driven  
633 conformational change and striking divergence in the substrate-binding clefts of pectin  
634 and pectate lyases, *Structure.* 5 (1997) 677–689. [https://doi.org/10.1016/S0969-](https://doi.org/10.1016/S0969-2126(97)00222-0)  
635 2126(97)00222-0.
- 636 [16] S. Yadav, P.K. Yadav, D. Yadav, K.D.S. Yadav, Pectin lyase: A review, *Process*  
637 *Biochem.* 44 (2009) 1–10. <https://doi.org/10.1016/j.procbio.2008.09.012>.
- 638 [17] F. Sénéchal, C. Wattier, C. Rustérucci, J. Pelloux, Homogalacturonan-modifying  
639 enzymes: Structure, expression, and roles in plants, *J. Exp. Bot.* 65 (2014) 5125–5160.  
640 <https://doi.org/10.1093/jxb/eru272>.
- 641 [18] B. Zeuner, T.B. Thomsen, M.A. Stringer, K.B.R.M. Krogh, A.S. Meyer, J. Holck,  
642 Comparative Characterization of *Aspergillus* Pectin Lyases by Discriminative  
643 Substrate Degradation Profiling, *Front. Bioeng. Biotechnol.* 8 (2020).  
644 <https://doi.org/10.3389/fbioe.2020.00873>.

- 645 [19] G. Yang, W. Chen, H. Tan, K. Li, J. Li, H. Yin, Biochemical characterization and  
646 evolutionary analysis of a novel pectate lyase from *Aspergillus parasiticus*, *Int. J. Biol.*  
647 *Macromol.* 152 (2020) 180–188. <https://doi.org/10.1016/j.ijbiomac.2020.02.279>.
- 648 [20] M.D. Yoder, S.E. Lietzke, F. Journak, Unusual structural features in the parallel  $\beta$ -helix  
649 in pectate lyases, *Structure*. 1 (1993) 241–251. [https://doi.org/10.1016/0969-](https://doi.org/10.1016/0969-2126(93)90013-7)  
650 [2126\(93\)90013-7](https://doi.org/10.1016/0969-2126(93)90013-7).
- 651 [21] J. Vitali, B. Schick, H.C.M. Kester, J. Visser, F. Journak, The Three-Dimensional  
652 Structure of *Aspergillus niger* Pectin Lyase B at 1.7-Å Resolution, *Plant Physiol.* 116  
653 (1998) 69–80. <https://doi.org/10.1104/pp.116.1.69>.
- 654 [22] S.E. Lietzke, R.D. Scavetta, M.D. Yoder, F. Journak, The Refined Three-Dimensional  
655 Structure of Pectate Lyase E from *Erwinia chrysanthemi* at 2.2 Å Resolution, *Plant*  
656 *Physiol.* 111 (1996) 73–92. <https://doi.org/10.1104/pp.111.1.73>.
- 657 [23] M. Akita, A. Suzuki, T. Kobayashi, S. Ito, T. Yamane, The first structure of pectate  
658 lyase belonging to polysaccharide lyase family 3, *Acta Crystallogr. Sect. D Biol.*  
659 *Crystallogr.* 57 (2001) 1786–1792. <https://doi.org/10.1107/S0907444901014482>.
- 660 [24] R. Pickersgill, J. Jenkins, G. Harris, W. Nasser, J. Robert Baudouy, The structure of  
661 *Bacillus subtilis* pectate lyase in complex with calcium, *Nat. Struct. Biol.* 1 (1994)  
662 717–723. <https://doi.org/10.1038/nsb1094-717>.
- 663 [25] A.S. Luis, J. Briggs, X. Zhang, B. Farnell, D. Ndeh, A. Labourel, A. Baslé, A.  
664 Cartmell, N. Terrapon, K. Stott, E.C. Lowe, R. McLean, K. Shearer, J. Schückel, I.  
665 Venditto, M.C. Ralet, B. Henrissat, E.C. Martens, S.C. Mosimann, D.W. Abbott, H.J.  
666 Gilbert, Dietary pectic glycans are degraded by coordinated enzyme pathways in  
667 human colonic *Bacteroides*, *Nat. Microbiol.* 3 (2018) 210–219.  
668 <https://doi.org/10.1038/s41564-017-0079-1>.
- 669 [26] K. Johansson, M. El-Ahmad, R. Friemann, H. Jörnvall, O. Markovič, H. Eklund,  
670 Crystal structure of plant pectin methylesterase, *FEBS Lett.* 514 (2002) 243–249.  
671 [https://doi.org/10.1016/S0014-5793\(02\)02372-4](https://doi.org/10.1016/S0014-5793(02)02372-4).
- 672 [27] S.W. Cho, S. Lee, W. Shin, The X-ray structure of *Aspergillus aculeatus*  
673 Polygalacturonase and a Modeled structure of the Polygalacturonase-Octagalacturonate  
674 Complex, *J. Mol. Biol.* 311 (2001) 863–878. <https://doi.org/10.1006/jmbi.2001.4919>.

- 675 [28] T.N. Petersen, S. Kauppinen, S. Larsen, The crystal structure of rhamnogalacturonase a  
676 from *Aspergillus aculeatus*: A right-handed parallel  $\beta$  helix, *Structure*. 5 (1997) 533–  
677 544. [https://doi.org/10.1016/S0969-2126\(97\)00209-8](https://doi.org/10.1016/S0969-2126(97)00209-8).
- 678 [29] R.D. Scavetta, S.R. Herron, A.T. Hotchkiss, N. Kita, N.T. Keen, J.A.E. Benen, H.C.M.  
679 Kester, J. Visser, F. Jurnak, Structure of a plant cell wall fragment complexed to  
680 pectate lyase C, *Plant Cell*. 11 (1999) 1081–1092.  
681 <https://doi.org/10.1105/tpc.11.6.1081>.
- 682 [30] A. Blum, M. Bressan, A. Zahid, I. Trinsoutrot-Gattin, A. Driouich, K. Laval,  
683 *Verticillium Wilt on Fiber Flax: Symptoms and Pathogen Development In Planta*, *Plant*  
684 *Dis.* 102 (2018) 2421–2429. <https://doi.org/10.1094/PDIS-01-18-0139-RE>.
- 685 [31] K. Zeise, A. Von Tiedemann, Host specialization among vegetative compatibility  
686 groups of *Verticillium dahliae* in relation to *Verticillium longisporum*, *J. Phytopathol.*  
687 150 (2002) 112–119. <https://doi.org/10.1046/j.1439-0434.2002.00730.x>.
- 688 [32] J. Zhang, X. Yu, C. Zhang, Q. Zhang, Y. Sun, H. Zhu, C. Tang, Pectin lyase enhances  
689 cotton resistance to *Verticillium wilt* by inducing cell apoptosis of *Verticillium dahliae*,  
690 *J. Hazard. Mater.* 404 (2021) 124029. <https://doi.org/10.1016/j.jhazmat.2020.124029>.
- 691 [33] Y. Yang, Y. Zhang, B. Li, X. Yang, Y. Dong, D. Qiu, A *Verticillium dahliae* Pectate  
692 Lyase Induces Plant Immune Responses and Contributes to Virulence, *Front. Plant Sci.*  
693 9 (2018) 1–15. <https://doi.org/10.3389/fpls.2018.01271>.
- 694 [34] D. Duressa, A. Anchieta, D. Chen, A. Klimes, M.D. Garcia-Pedrajas, K.F. Dobinson,  
695 S.J. Klosterman, RNA-seq analyses of gene expression in the microsclerotia of  
696 *Verticillium dahliae*, *BMC Genomics*. 14 (2013) 5–18. <https://doi.org/10.1186/1471-2164-14-607>.
- 698 [35] J. Safran, O. Habrylo, M. Cherkaoui, S. Lecomte, A. Voxeur, S. Pilard, S. Bassard, C.  
699 Pau-Roblot, D. Mercadante, J. Pelloux, F. Sénéchal, New insights into the specificity  
700 and processivity of two novel pectinases from *Verticillium dahliae*, *Int. J. Biol.*  
701 *Macromol.* 176 (2021) 165–176. <https://doi.org/10.1016/j.ijbiomac.2021.02.035>.
- 702 [36] A. Lemaire, C. Duran Garzon, A. Perrin, O. Habrylo, P. Trezel, S. Bassard, V.  
703 Lefebvre, O. Van Wuytswinkel, A. Guillaume, C. Pau-Roblot, J. Pelloux, Three novel  
704 rhamnogalacturonan I- pectins degrading enzymes from *Aspergillus aculeatinus*:  
705 Biochemical characterization and application potential, *Carbohydr. Polym.* 248 (2020)

- 706 116752. <https://doi.org/10.1016/j.carbpol.2020.116752>.
- 707 [37] W. Kabsch, Xds., *Acta Crystallogr. D. Biol. Crystallogr.* 66 (2010) 125–32.  
708 <https://doi.org/10.1107/S0907444909047337>.
- 709 [38] W. Kabsch, Integration, scaling, space-group assignment and post-refinement, *Acta*  
710 *Crystallogr. Sect. D Biol. Crystallogr.* 66 (2010) 133–144.  
711 <https://doi.org/10.1107/S0907444909047374>.
- 712 [39] B.W. Matthews, Solvent content of protein crystals., *J. Mol. Biol.* 33 (1968) 491–497.  
713 [https://doi.org/10.1016/0022-2836\(68\)90205-2](https://doi.org/10.1016/0022-2836(68)90205-2).
- 714 [40] A.J. McCoy, R.W. Grosse-Kunstleve, P.D. Adams, M.D. Winn, L.C. Storoni, R.J.  
715 Read, Phaser crystallographic software, *J. Appl. Crystallogr.* 40 (2007) 658–674.  
716 <https://doi.org/10.1107/S0021889807021206>.
- 717 [41] Y. Zheng, C.H. Huang, W. Liu, T.P. Ko, Y. Xue, C. Zhou, R.T. Guo, Y. Ma, Crystal  
718 structure and substrate-binding mode of a novel pectate lyase from alkaliphilic *Bacillus*  
719 *sp.* N16-5, *Biochem. Biophys. Res. Commun.* 420 (2012) 269–274.  
720 <https://doi.org/10.1016/j.bbrc.2012.02.148>.
- 721 [42] D. Liebschner, P. V. Afonine, M.L. Baker, G. Bunkoczi, V.B. Chen, T.I. Croll, B.  
722 Hintze, L.W. Hung, S. Jain, A.J. McCoy, N.W. Moriarty, R.D. Oeffner, B.K. Poon,  
723 M.G. Prisant, R.J. Read, J.S. Richardson, D.C. Richardson, M.D. Sammito, O. V.  
724 Sobolev, D.H. Stockwell, T.C. Terwilliger, A.G. Urzhumtsev, L.L. Videau, C.J.  
725 Williams, P.D. Adams, Macromolecular structure determination using X-rays, neutrons  
726 and electrons: Recent developments in Phenix, *Acta Crystallogr. Sect. D Struct. Biol.*  
727 75 (2019) 861–877. <https://doi.org/10.1107/S2059798319011471>.
- 728 [43] P. Emsley, B. Lohkamp, W.G. Scott, K. Cowtan, Features and development of Coot,  
729 *Acta Crystallogr. Sect. D Biol. Crystallogr.* 66 (2010) 486–501.  
730 <https://doi.org/10.1107/S0907444910007493>.
- 731 [44] L. Hocq, S. Guinand, O. Habrylo, A. Voxeur, W. Tabi, J. Safran, F. Fournet, J.-M.  
732 Domon, J.-C. Mollet, S. Pilard, C. Pau-Roblot, A. Lehner, J. Pelloux, V. Lefebvre, The  
733 exogenous application of AtPGLR, an endo -polygalacturonase, triggers pollen tube  
734 burst and repair, *Plant J.* 103 (2020) 617–633. <https://doi.org/10.1111/tpj.14753>.
- 735 [45] K. Lindorff-Larsen, S. Piana, K. Palmo, P. Maragakis, J.L. Klepeis, R.O. Dror, D.E.

- 736 Shaw, Improved side-chain torsion potentials for the Amber ff99SB protein force field,  
737 Proteins Struct. Funct. Bioinforma. 78 (2010) 1950–1958.  
738 <https://doi.org/10.1002/prot.22711>.
- 739 [46] W.L. Jorgensen, J. Chandrasekhar, J.D. Madura, R.W. Impey, M.L. Klein, Comparison  
740 of simple potential functions for simulating liquid water, J. Chem. Phys. 79 (1983)  
741 926–935. <https://doi.org/10.1063/1.445869>.
- 742 [47] J.S. Rowlinson, The Maxwell-boltzmann distribution, Mol. Phys. 103 (2005) 2821–  
743 2828. <https://doi.org/10.1080/002068970500044749>.
- 744 [48] H.J.C. Berendsen, J.P.M. Postma, W.F. Van Gunsteren, A. Dinola, J.R. Haak,  
745 Molecular dynamics with coupling to an external bath, J. Chem. Phys. 81 (1984) 3684–  
746 3690. <https://doi.org/10.1063/1.448118>.
- 747 [49] M. Parrinello, A. Rahman, Polymorphic transitions in single crystals: A new molecular  
748 dynamics method, J. Appl. Phys. 52 (1981) 7182–7190.  
749 <https://doi.org/10.1063/1.328693>.
- 750 [50] T. Darden, D. York, L. Pedersen, Particle mesh Ewald: An N·log(N) method for Ewald  
751 sums in large systems, J. Chem. Phys. 98 (1993) 10089–10092.  
752 <https://doi.org/10.1063/1.464397>.
- 753 [51] T. Kluyver, B. Ragan-Kelley, F. Pérez, B. Granger, M. Bussonnier, J. Frederic, K.  
754 Kelley, J. Hamrick, J. Grout, S. Corlay, P. Ivanov, D. Avila, S. Abdalla, C. Willing,  
755 Jupyter Notebooks—a publishing format for reproducible computational workflows,  
756 Position. Power Acad. Publ. Play. Agents Agendas - Proc. 20th Int. Conf. Electron.  
757 Publ. ELPUB 2016. (2016) 87–90. <https://doi.org/10.3233/978-1-61499-649-1-87>.
- 758 [52] J.D. Hunter, Matplotlib: A 2D graphics environment, Comput. Sci. Eng. 9 (2007) 90–  
759 95. <https://doi.org/10.1109/MCSE.2007.55>.
- 760 [53] W. Humphrey, A. Dalke, K. Schulten, VMD: Visual Molecular Dynamics, J. Mol.  
761 Graph. 14 (1996) 33–38.
- 762 [54] S.J. Klosterman, K. V. Subbarao, S. Kang, P. Veronese, S.E. Gold, B.P.H.J. Thomma,  
763 Z. Chen, B. Henrissat, Y.-H. Lee, J. Park, M.D. Garcia-Pedrajas, D.J. Barbara, A.  
764 Anchieta, R. de Jonge, P. Santhanam, K. Maruthachalam, Z. Atallah, S.G. Amyotte, Z.  
765 Paz, P. Inderbitzin, R.J. Hayes, D.I. Heiman, S. Young, Q. Zeng, R. Engels, J. Galagan,



- 766 C.A. Cuomo, K.F. Dobinson, L.-J. Ma, Comparative Genomics Yields Insights into  
767 Niche Adaptation of Plant Vascular Wilt Pathogens, *PLoS Pathog.* 7 (2011) e1002137.  
768 <https://doi.org/10.1371/journal.ppat.1002137>.
- 769 [55] S. Mandelc, B. Javornik, The secretome of vascular wilt pathogen *Verticillium albo-*  
770 *atrum* in simulated xylem fluid, *Proteomics.* 15 (2015) 787–797.  
771 <https://doi.org/10.1002/pmic.201400181>.
- 772 [56] S.D. Liston, S.A. McMahon, A. Le Bas, M.D.L. Suits, J.H. Naismith, C. Whitfield,  
773 Periplasmic depolymerase provides insight into ABC transporter-dependent secretion  
774 of bacterial capsular polysaccharides, *Proc. Natl. Acad. Sci. U. S. A.* 115 (2018)  
775 E4870–E4879. <https://doi.org/10.1073/pnas.1801336115>.
- 776 [57] J. Jenkins, R. Pickersgill, The architecture of parallel  $\beta$ -helices and related folds, *Prog.*  
777 *Biophys. Mol. Biol.* 77 (2001) 111–175. [https://doi.org/10.1016/S0079-](https://doi.org/10.1016/S0079-6107(01)00013-X)  
778 [6107\(01\)00013-X](https://doi.org/10.1016/S0079-6107(01)00013-X).
- 779 [58] M.D. Yoder, F. Journak, The Refined Three-Dimensional Structure of Pectate Lyase C  
780 Implications for an Enzymatic Mechanism, *Plant Physiol.* 107 (1995) 349–364.
- 781 [59] Y. van Santen, J.A.E. Benen, K.H. Schroter, K.H. Kalk, S. Armand, J. Visser, B.W.  
782 Dijkstra, 1.68-angstrom crystal structure of endopolygalacturonase II from *Aspergillus*  
783 *niger* and identification of active site residues by site-directed mutagenesis, *J. Biol.*  
784 *Chem.* 274 (1999) 30474–30480. <https://doi.org/10.1074/JBC.274.43.30474>.
- 785 [60] S.E. Lietzke, R.D. Scavetta, M.D. Yoder, The Refined Three-Dimensional Structure of  
786 Pectate Lyase E from, *Plant Physiol.* 111 (1996) 73–92.
- 787 [61] B. Henrissat, S.E. Heffron, M.D. Yoder, S.E. Lietzke, F. Journak, Functional  
788 implications of structure-based sequence alignment of proteins in the extracellular  
789 pectate lyase superfamily., *Plant Physiol.* 107 (1995) 963–76.  
790 <https://doi.org/10.1104/pp.107.3.963>.
- 791 [62] N. Kita, C.M. Boyd, M.R. Garrett, F. Journak, N.T. Keen, Differential Effect of Site-  
792 directed Mutations in *pelC* on Pectate Lyase Activity, Plant Tissue Maceration, and  
793 Elicitor Activity, *J. Biol. Chem.* 271 (1996) 26529–26535.  
794 <https://doi.org/10.1074/jbc.271.43.26529>.
- 795 [63] S. Ali, C.R. Søndergaard, S. Teixeira, R.W. Pickersgill, Structural insights into the loss

- 796 of catalytic competence in pectate lyase activity at low pH, *FEBS Lett.* 589 (2015)  
797 3242–3246. <https://doi.org/10.1016/j.febslet.2015.09.014>.
- 798 [64] C. Creze, S. Castang, E. Derivery, R. Haser, N. Hugouvieux-Cotte-Pattat, V.E.  
799 Shevchik, P. Gouet, The Crystal Structure of Pectate Lyase PelI from Soft Rot  
800 Pathogen *Erwinia chrysanthemi* in Complex with Its Substrate, *J. Biol. Chem.* 283  
801 (2008) 18260–18268. <https://doi.org/10.1074/jbc.M709931200>.
- 802 [65] A. Dubey, S. Yadav, M. Kumar, G. Anand, D. Yadav, *Molecular Biology of Microbial*  
803 *Pectate Lyase: A Review*, *Br. Biotechnol. J.* 13 (2016) 1–26.  
804 <https://doi.org/10.9734/bbj/2016/24893>.
- 805 [66] H.G. Ouattara, S. Reverchon, S.L. Niamke, W. Nasser, *Biochemical Properties of*  
806 *Pectate Lyases Produced by Three Different Bacillus Strains Isolated from Fermenting*  
807 *Cocoa Beans and Characterization of Their Cloned Genes*, *Appl. Environ. Microbiol.*  
808 76 (2010) 5214–5220. <https://doi.org/10.1128/AEM.00705-10>.
- 809 [67] M. Soriano, A. Blanco, P. Díaz, F.I.J. Pastor, An unusual pectate lyase from a *Bacillus*  
810 *sp.* with high activity on pectin: Cloning and characterization, *Microbiology.* 146  
811 (2000) 89–95. <https://doi.org/10.1099/00221287-146-1-89>.
- 812 [68] G. Chilosi, P. Magro, *Pectin lyase and polygalacturonase isoenzyme production by*  
813 *Botrytis cinerea* during the early stages of infection on different host plants, *J. Plant*  
814 *Pathol.* 79 (1997) 61–69. <https://doi.org/10.1080/01904167.2015.1112950>.
- 815 [69] S. Hassan, V.E. Shevchik, X. Robert, N. Hugouvieux-Cotte-Pattat, PelN is a new  
816 pectate lyase of *dickeya dadantii* with unusual characteristics, *J. Bacteriol.* 195 (2013)  
817 2197–2206. <https://doi.org/10.1128/JB.02118-12>.
- 818 [70] C. Zhou, Y. Xue, Y. Ma, Cloning, evaluation, and high-level expression of a thermo-  
819 alkaline pectate lyase from alkaliphilic *Bacillus clausii* with potential in ramie  
820 degumming, *Appl. Microbiol. Biotechnol.* 101 (2017) 3663–3676.  
821 <https://doi.org/10.1007/s00253-017-8110-2>.
- 822 [71] W. Sukhumsirchart, S. Kawanishi, W. Deesukon, K. Chansiri, H. Kawasaki, T.  
823 Sakamoto, Purification, Characterization, and Overexpression of Thermophilic Pectate  
824 Lyase of *Bacillus sp.* RN1 Isolated from a Hot Spring in Thailand, *Biosci. Biotechnol.*  
825 *Biochem.* 73 (2009) 268–273. <https://doi.org/10.1271/bbb.80287>.

- 826 [72] C. Zhang, J. Yao, C. Zhou, L. Mao, G. Zhang, Y. Ma, The alkaline pectate lyase  
827 PEL168 of *Bacillus subtilis* heterologously expressed in *Pichia pastoris* more stable  
828 and efficient for degumming ramie fiber, *BMC Biotechnol.* 13 (2013) 26.  
829 <https://doi.org/10.1186/1472-6750-13-26>.
- 830 [73] P. Yuan, K. Meng, Y. Wang, H. Luo, P. Shi, H. Huang, T. Tu, P. Yang, B. Yao, A  
831 Low-Temperature-Active Alkaline Pectate Lyase from *Xanthomonas campestris*  
832 ACCC 10048 with High Activity over a Wide pH Range, *Appl. Biochem. Biotechnol.*  
833 168 (2012) 1489–1500. <https://doi.org/10.1007/s12010-012-9872-8>.
- 834 [74] Y. Tang, P. Wu, S. Jiang, J.N. Selvaraj, S. Yang, G. Zhang, A new cold-active and  
835 alkaline pectate lyase from Antarctic bacterium with high catalytic efficiency, *Appl.*  
836 *Microbiol. Biotechnol.* 103 (2019) 5231–5241. [https://doi.org/10.1007/s00253-019-](https://doi.org/10.1007/s00253-019-09803-1)  
837 [09803-1](https://doi.org/10.1007/s00253-019-09803-1).
- 838 [75] P. Wu, S. Yang, Z. Zhan, G. Zhang, Origins and features of pectate lyases and their  
839 applications in industry, *Appl. Microbiol. Biotechnol.* 104 (2020) 7247–7260.  
840 <https://doi.org/10.1007/s00253-020-10769-8>.
- 841 [76] Z. Zhou, Y. Liu, Z. Chang, H. Wang, A. Leier, T.T. Marquez-Lago, Y. Ma, J. Li, J.  
842 Song, Structure-based engineering of a pectate lyase with improved specific activity for  
843 ramie degumming, *Appl. Microbiol. Biotechnol.* 101 (2017) 2919–2929.  
844 <https://doi.org/10.1007/s00253-016-7994-6>.
- 845

## Supplementary materials caption:

### Table S1. Primers for cloning mutated forms of VdPelB into pPICZαB expression vectors

Restriction enzymes sites for PstI and NotI are underlined added bases are written in *italics*. Mutation bases are **bolded**.

### Table S1. VdPelB and AsPel concentrations used for pectin degradation and OGs analysis.

The different enzymes concentrations were used to have enzymes at iso-activities.

### Fig. S1. Purification and SDS-PAGE analysis of wild-type and mutated forms of VdPelB

Wild-type (A) and mutated forms (B) of VdPelB were purified using 1 mL Ni NTA colon. Proteins were resolved on a 12% polyacrylamide gel and were stained by Coomassie blue. L-ladder.

### Fig. S2. VdPelB crystal packing and structural alignment

A) Ribbon diagram of two molecules of VdPelB crystalized in P1 21 1 space group. B) Structural alignment of VdPelB with BsPelA, DdPelC, AnPelA. VdPelB shares highest structural alignment with BsPelA (PDB: 3VMV, orange) with 30.06% sequence identity and rmsd of 1.202 Å. Second best alignment was with DdPelC (PDB: 1AIR, plum) with 24.20% identity and rmsd of 1.453 Å. Pectin lyase with T3 loop described in AnPelA (PDB: 1IDJ, green).

### Fig. S3. Average B-factors and occupancies of VdPelB

A) VdPelB chain A and B colored by B-factors. B) VdPelB chain A and B colored by occupancies.

### Fig. S4. β-sheets and T-turns structures of VdPelB

A) Ribbon structure representing β-sheets (PB1-purple, PB2-yellow and PB3-red) B) Ribbon structure representing T-turns for VdPelB (T1-lime green, T2- orange red, T3 medium purple. β-strands and T-turns are named accordingly to Petersen et al. 1997.

### Fig. S5. Primary sequence alignment of VdPelB with BsPelA, BsPelA-P15, DdPelC, AnPelA, AnPelB

VdPelB primary sequence alignment with *Dickeya dadanti* DdPelC (P11073), *Bacillus* Sp. KSM-P15 BsPel-P15 (Q9RHW0), *Bacillus* sp. N16-5 BsPelA (D0VP31), *Aspergillus niger* AnPelA (Q01172), AnPelB (Q00205). Conserved AA are red boxed.

### Fig. S6. Superimposed tetramer ligand from DdPelC to VdPelB structure

Tetramer ligand from DdPelC (PDB: 2EWE, gray) superimposed to VdPelB structure. Aa involved in interaction are yellow-coloured. Hydrogen bonds and Van der Waals contacts are coloured black and blue.

### Fig. S7. Effects of Ca<sup>2+</sup> on VdPelB activity

A) Calcium-dependence of VdPelB activity. The activities were measured after 12 min of incubation with PGA, with/without addition of Ca<sup>2+</sup> or Ca<sup>2+</sup> and EDTA, at 35°C B) PGA digested using VdPelB for 12 min at 40°C and pH 8 with increasing concentrations of Ca<sup>2+</sup>.

### Fig. S8. Temperature-dependence of VdPelB-N activity

The activities were measured after 12 min of incubation with PGA at pH 8. Values correspond to means of three replicates.

### Fig. S9. VdPelB mutants activity on PGA

The activities were measured after 12 min of incubation with PGA with addition of Ca<sup>2+</sup> at 35°C. Values correspond to means of three replicates ± SD.

### Fig. S10. Substrate-dependence of AsPel

The activities were measured after 12 min of incubation with PGA, pectins DM 24-30%, DM 55-70%, with/without addition of Ca<sup>2+</sup> or Ca<sup>2+</sup> and EDTA, at 35°C. Values correspond to means of three replicates ± SD.

### Fig. S11 : Example of MS<sup>2</sup> fragmentation pattern of GalA<sub>6</sub>Me<sub>1</sub>-H<sub>2</sub>O

MS<sup>2</sup> fragmentation pattern of GalA<sub>6</sub>-H<sub>2</sub>O oligomer (m/z 1055,185252, 527,0889878) produced by VdPelB from pectin DM >85%. Subscript numbers indicate the degree of polymerization.

### Fig. S12 : Example of MS<sup>2</sup> fragmentation pattern of GalA<sub>4</sub>Me<sub>1</sub>

MS<sup>2</sup> fragmentation pattern of GalA<sub>4</sub>Me<sub>1</sub> oligomer (m/z 735,1472907) produced by VdPelB from pectin DM >85%. Subscript numbers indicate the degree of polymerization.

| Enzyme        | Forward 5' – 3'                       | Reverse 3'-5'                            |
|---------------|---------------------------------------|------------------------------------------|
| VdPelB-Native | TCTAA <u>CTGCAGG</u> AACGCCCACTCCCACC | TGCAC <u>GCGGCCGCG</u> GAAGCCAAGGGTCTGGC |
| VdPelB-G125R  | GCCATT <b>CG</b> TATCCAGGCCTCTAAGAACG | CGTTCTTAGAGGCCTG GATA <b>ACG</b> AATGGC  |
| VdPelB-D151R  | GGCAAGGACTACTAT <b>AG</b> AGGTCTCCTCG | CGAGGAGACCT <b>CT</b> ATAGTAGTCCTTGCC    |
| VdPelB-T157K  | CGATATCA <b>AG</b> CACGGCTCCG         | CGGAGCCGTG <b>CTT</b> GATATCG            |
| VdPelB-L178Y  | GGCCTCGT <b>AT</b> ATCGGCCACACC       | GGTGTGGCCGAT <b>ATAC</b> GAGGCC          |
| VdPelB-H181A  | GCTTATCGGC <b>GCC</b> ACCGACTCG       | CGAGTCGGT <b>GGC</b> GCCGATAAGC          |

**Table S1. Primers for cloning mutated forms of VdPelB into pPICzαB expression vectors**

Restriction enzymes sites for PstI and NotI are underlined added bases are written in *italics*. Mutation bases are **bolded**.

| Name                            | VdPeIB* |         | AsPel** |        |
|---------------------------------|---------|---------|---------|--------|
|                                 | 1       | 2       | 1       | 2      |
| Concentration                   |         |         |         |        |
| Sugar beet pectin DM 42% DA 31% | 0.077   | 0.00385 | 0.7     | 0.0875 |
| Citrus pectin DM 24-30%.        | 0.077   | 0.0385  | 0.7     | 0.35   |

\*  $\mu\text{g}/\mu\text{L}$ , \*\* U/mL final concentration

**Table S2. VdPeIB and AsPel concentration used for pectin degradation and OGs analysis.**  
The different enzymes concentrations were used to have enzymes at iso-activities.



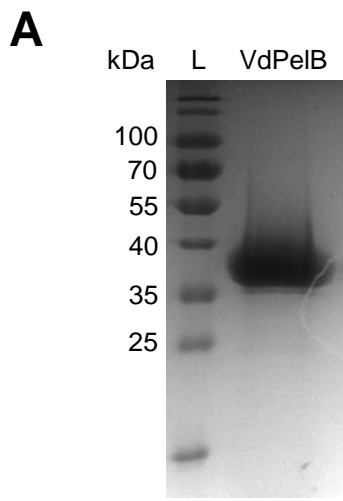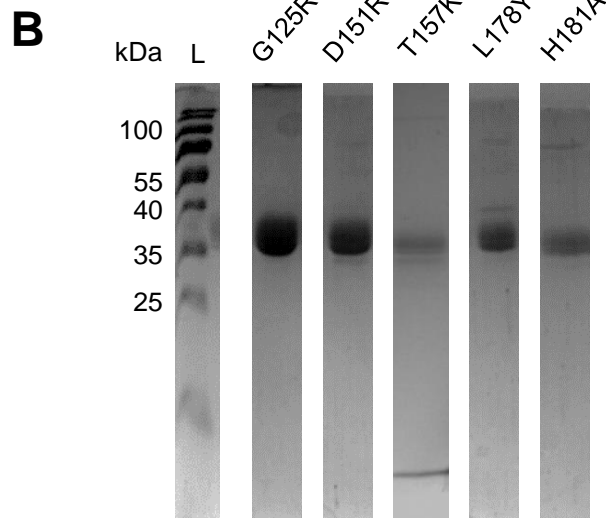

**Fig. S1. Purification and SDS-PAGE analysis of wild-type and mutated forms of VdPelB**

Wild-type (A) and mutated forms (B) of VdPelB were purified using 1 mL Ni NTA colon. Proteins were resolved on a 12% polyacrylamide gel (SDS-PAGE) and were stained by Coomassie blue. L-ladder. The figure of SDS-PAGE representing mutants (B) was composed of several different images.

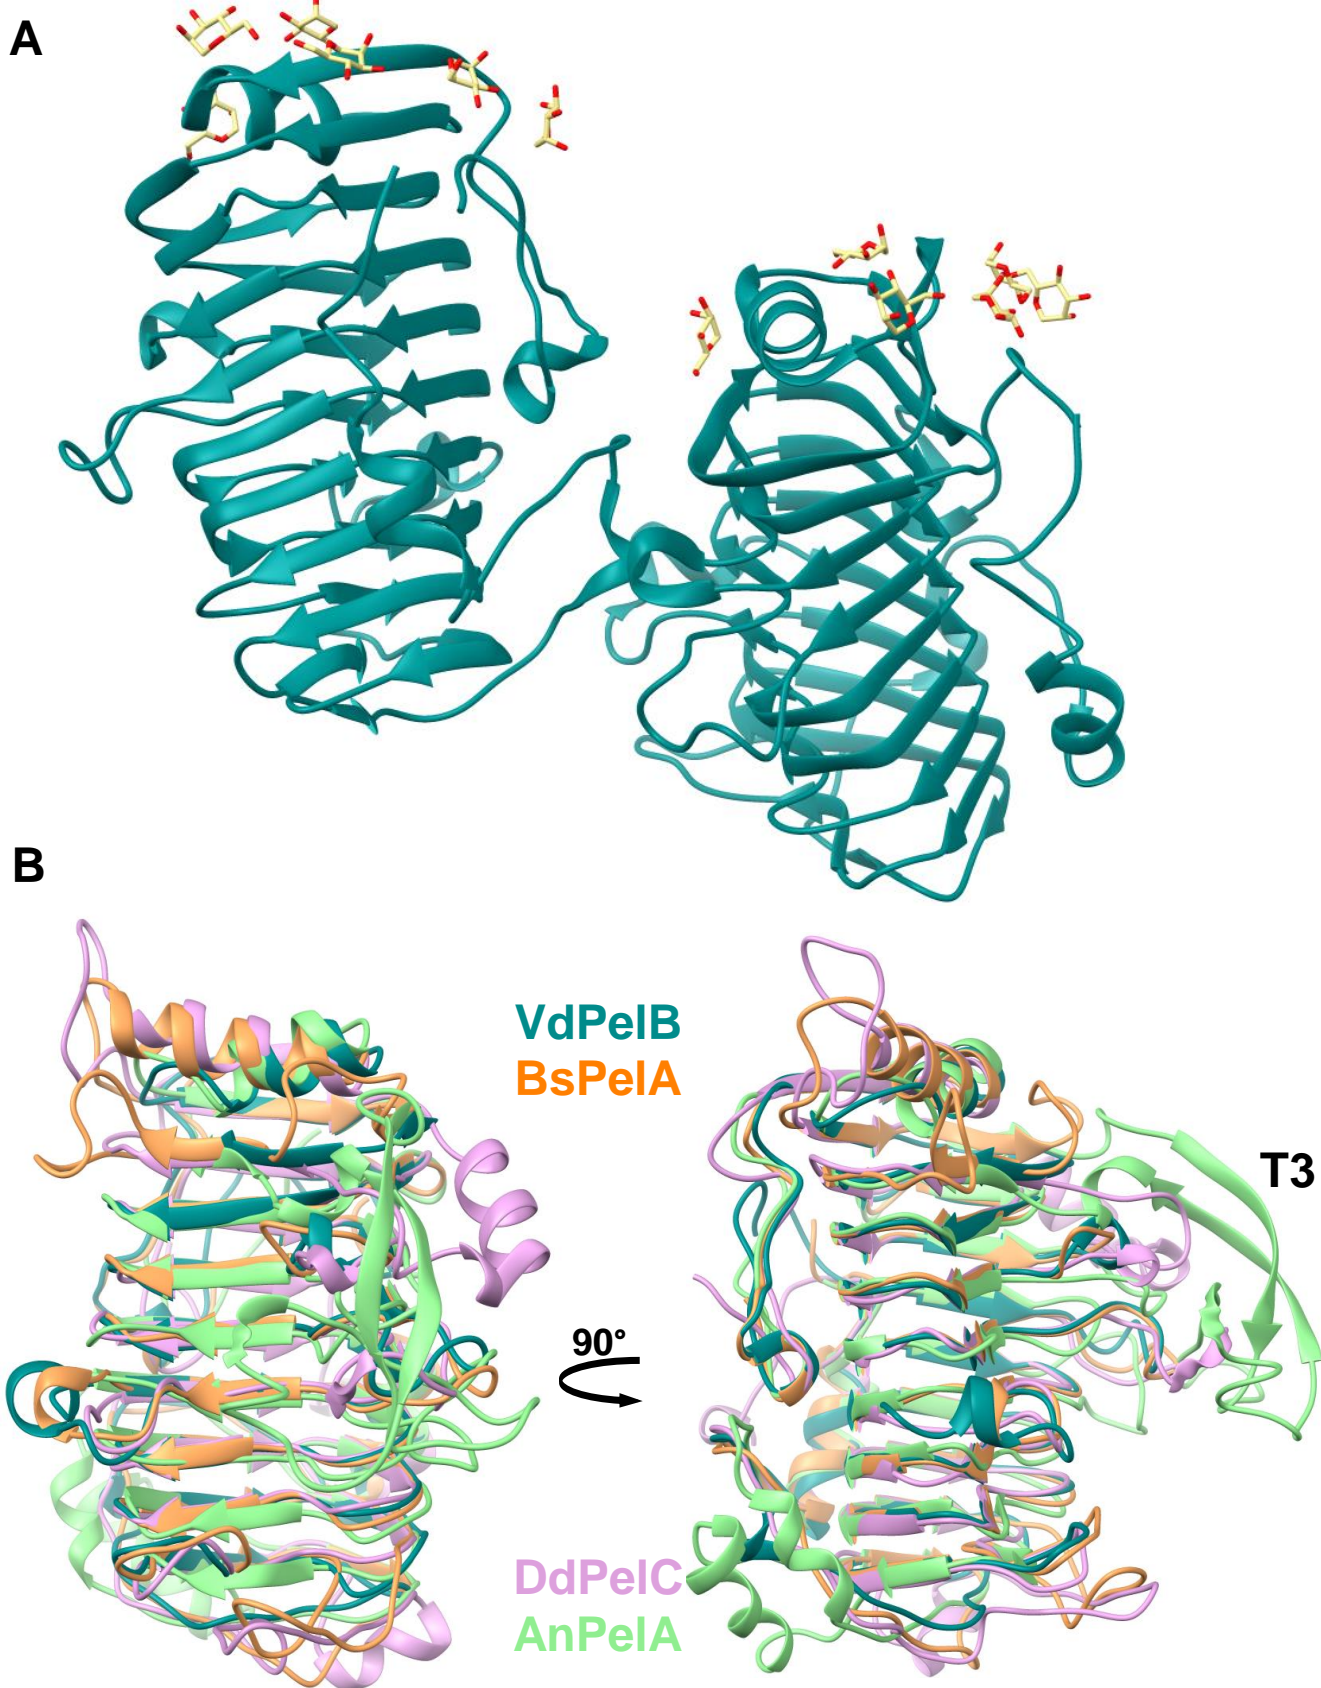

**Fig. S2. VdPelB crystal packing and structural alignment**

A) Ribbon diagram of two molecules of VdPelB crystalized in P1 21 1 space group. **B)** Structural alignment of VdPelB with BsPelA, DdPelC, AnPelA. VdPelB shares highest structural alignment with BsPelA (PDB: 3VMV, orange) with 30.06% sequence identity and rmsd of 1.202 Å. Second best alignment was with DdPelC (PDB: 1AIR, plum) with 24.20% identity and rmsd of 1.453 Å. Pectin lyase with T3 loop described in AnPelA (PDB: 1IDJ, green).

**A**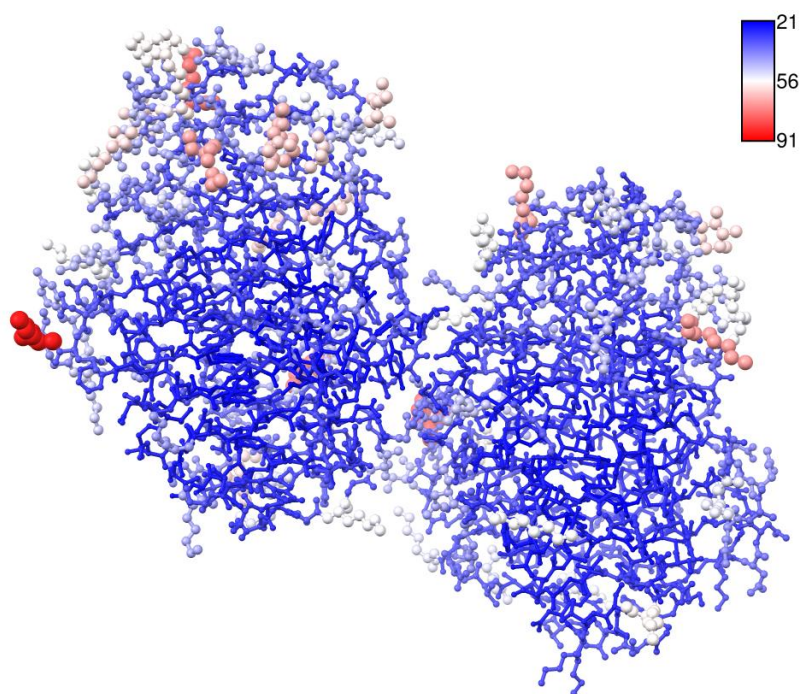**B**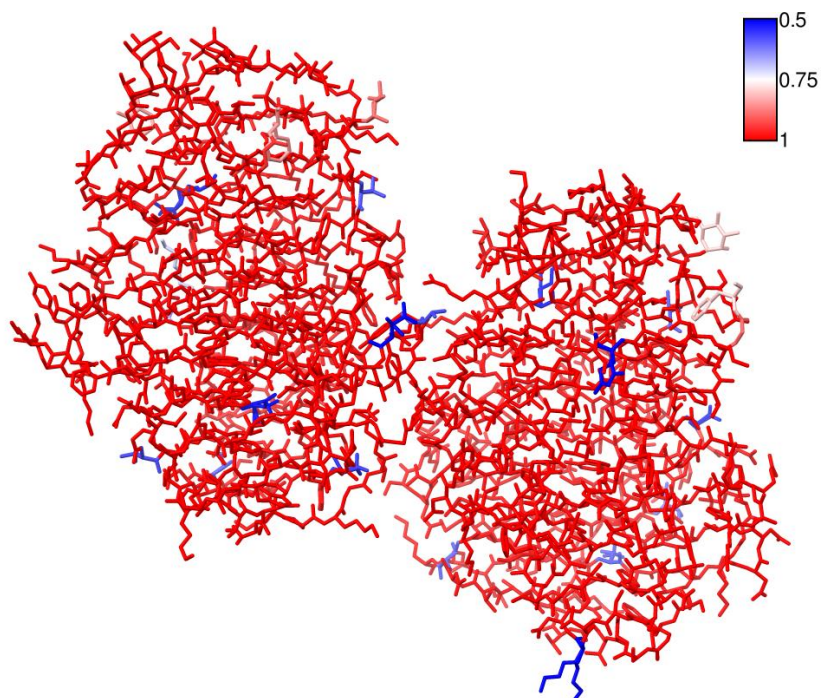

**Fig. S3. Average B-factors and occupancies of VdPelB**

**A)** VdPelB chain A and B colored by B-factors. **B)** VdPelB chain A and B colored by occupancies.



**A**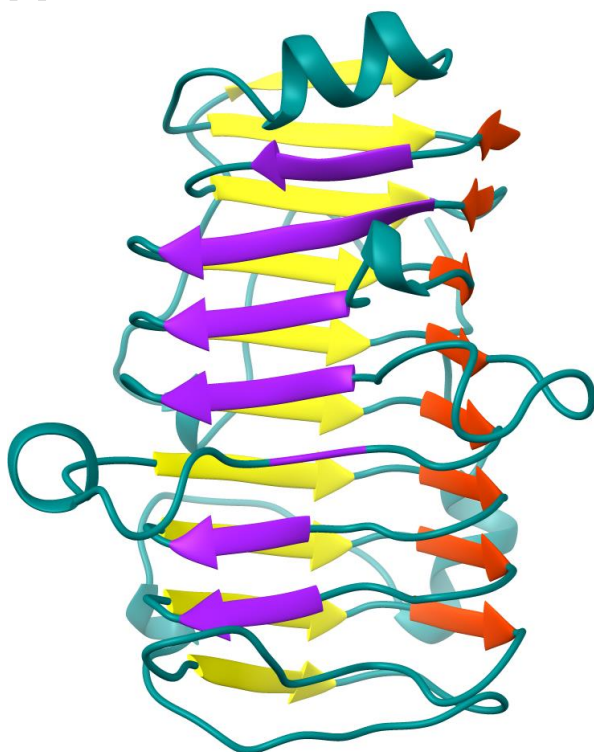**B**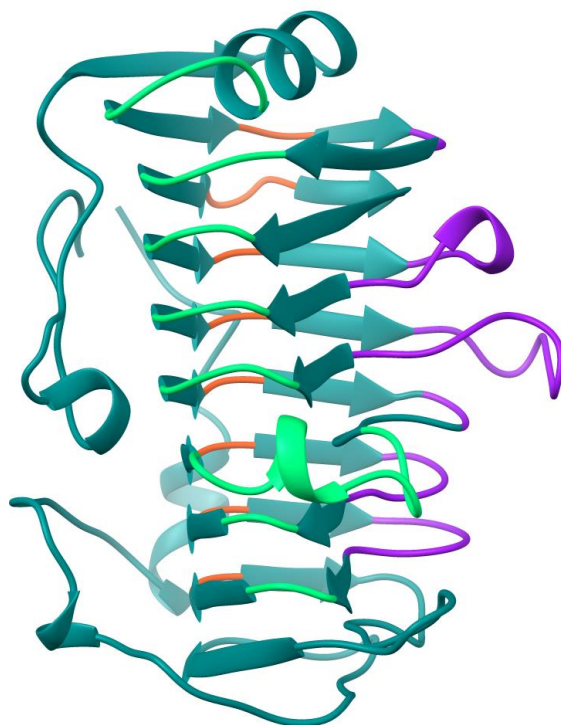

**Fig. S4.  $\beta$ -sheets and T-turns structures of VdPelB**

A) Ribbon structure representing  $\beta$ -sheets (PB1-purple, PB2-yellow and PB3-red) B) Ribbon structure representing T-turns for VdPelB (T1-lime green, T2- orange red, T3 medium purple.  $\beta$ -strands and T-turns are named accordingly to Petersen et al. 1997.

|           |                                                                |     |
|-----------|----------------------------------------------------------------|-----|
| BsPel-P15 | -----APTVVHETIRVP-----AGQTFDGGKQTYVANPTLGDGSQA--               | 37  |
| AnPe1A    | -----VGVSQSAEGFAEGVTGGGDA-TPVYPTDIDELVSYL-                     | 35  |
| AnPe1B    | -----AGVVGAAEGFAHGVTGGGSA-SPVYPTTIDELVSYL-                     | 35  |
| DdPe1C    | -----ATDTGG-YAATAGGNVTGAVS-KTA--TSMQDVIWIID                    | 34  |
| BsPe1A    | -----SNGPQG-YASMNGGTTGGAGG-RVEYASTGAQIQQLID                    | 36  |
| VdPe1B    | TPTPTIQEDGSPALIAKRASVTEESCNIQ-YASTNGGTTGGKGG-ATTTVSTLAQFTKAA-  | 57  |
|           | * : : .                                                        |     |
| BsPel-P15 | -----ENQKPI-FRLEAGASLKN-----VWIGAPAADGVHICYGDCTITNVIW          | 78  |
| AnPe1A    | -----GDDEARVIVLTKTFDFTDSEGTGTTGTGCAPWGTASACQV--AIDQDDW         | 81  |
| AnPe1B    | -----GDNEPRVILDQTFDFTGTEGTEGTTGTCAPWGTASQCQV--AINLHSW          | 81  |
| DdPe1C    | AARLDANGKKVKGAYPLVITYTGNED-----S-----LINAAAANICGQ-----W        | 75  |
| BsPe1A    | NRS-----RSNNPDEPLTIYVNGTIT-----Q-----GNSPQSLI-----D            | 67  |
| VdPe1B    | -----ESSGKLNIVVKGKIS-----G-----GAKVRVQS-----                   | 81  |
|           | : .                                                            |     |
| BsPel-P15 | EDVGE-----DALTLKSSGTV-NISGGAAYKAYDKVFQINAAGTINIRNF             | 122 |
| AnPe1A    | CENYEPDAPSVSVEYYNAGVLGITVTSNKS LIGEGSSGAIKG-KGLRIVSGAENIIIQNI  | 140 |
| AnPe1B    | CDNYQASAPKVSVTYDKAGILPITVNSNKSIVGQGTGKGVIKG-KGLRVVSGAKNVIQNI   | 140 |
| DdPe1C    | SKDPR-----GV-----EIKEFTKGITIIIGANGSSAN-FGIWI-KKSSDWWVQNM       | 118 |
| BsPe1A    | VKNHR----GK-----AHEIKNISIIIGVGTNGEFDG-IGIRL-SMAHNIIIQNV        | 110 |
| VdPe1B    | -----DKTIIG-QKGSELVG-TGLYI-NKVKNVIVRNM                         | 111 |
|           | : . : . : : *                                                  |     |
| BsPel-P15 | RADDIGKLVQRNGGTYKVV-----MNVENCNISRVKDAIL--RTDSSTSTGRIVNTRY     | 175 |
| AnPe1A    | AVTDINPKYVW-GGDAITL-DOCDLWIDHVTTARIGRQ-----HYVLTGSAD           | 186 |
| AnPe1B    | AVTDINPKYVW-GGDAITV-DDSDLWIDHVTTARIGRQ-----HIVLTGSAD           | 186 |
| DdPe1C    | RIGYLPGG-AK-DGDMIRV-DDSPNWWDHNELFAANHECDGTPDNDTTFESAVDIKIGAS   | 175 |
| BsPe1A    | SIHHVREG-E---GTAIEVTDOSKNWIDHNEFYSEFPNG---DSDYYDGLVDMKRNA      | 162 |
| VdPe1B    | KISKVKDS-N---GDAIGIQ-ASKNWWDHCDLSSDLK--S-----GKDYYDGLLDITHGS   | 160 |
|           | : * : : : .                                                    |     |
| BsPel-P15 | NVPT----LFKGFKSGNTTASGNTQY-----                                | 197 |
| AnPe1A    | NRVSLTNMYIDGVS DY SAT CDGYHYWGIYLDGDADLVTMKGNYIYHTSGRSPKVDNTLL | 246 |
| AnPe1B    | NRVTISYSLIDGRSDYSATCNGHHYWGVIYLDGSDNMDVTLKGNFYNLSGRMPKVGNTLL   | 246 |
| DdPe1C    | NTVTVSYNYIHGVKKV--GLDGSSSD-----TGRNITYHHNYNDVNARLPLQRG-GLV     | 227 |
| BsPe1A    | EYITVSWNK FENHWKT--MLVGHTDNASLA---PDKITYHHNYFNLSRVPLIRY-ADV    | 216 |
| VdPe1B    | DWVTVSNTFLHDHFKA--SLIGHTDSNAKEDKGLHVTYANNYWNVNSRNPVSRF-GTV     | 217 |
|           | : : : . *                                                      |     |
| BsPel-P15 | -----                                                          | 197 |
| AnPe1A    | HCVNMYFYDISGHAFEIGEGGYVLAEGNVFQVNDTVLET-YEG---A-----AFTV       | 293 |
| AnPe1B    | HAVNNLFHNFDDGHAFEIGTGGYVLAEGNVFQVNVVETPISG---Q-----LFSS        | 294 |
| DdPe1C    | HAYNNLYTNITGSGLNVRQNGQALIENWFEKAINP---VTS-----RYDG             | 270 |
| BsPe1A    | HMFNMYFKDINDTAINSRVGARVFNENYFDNVGSGQADPTT---GF-IKGPVGFYGS      | 271 |
| VdPe1B    | HIYNNYYLEVGS SAVNTRMGAQVRVES TVFDKSTKNGIISVDSKEKGYATVGDISWGSST | 277 |
| BsPel-P15 | -----                                                          | 197 |
| AnPe1A    | PSTTAGEVCSTYLGRDCVINGFGCSGTFSEDS TS-----FLSDFEGKNIAS-          | 339 |
| AnPe1B    | PDANTNQCCASVFGRSQCLNAFGNSGSMGSDTS-----IISKFAGKTIAA-            | 340 |
| DdPe1C    | KNFGTWL-----K---GNNITKPADFSTYSITWTADTKPYVNADSWTSTGTFPTVAYN     | 321 |
| BsPe1A    | PSTGYWNL-----R---GNVFNTPNS-----HLNSTNFPPYS                     | 303 |
| VdPe1B    | -----N---TAPKG-----TL---GSSNIPYS                               | 293 |
| BsPel-P15 | -----                                                          | 197 |
| AnPe1A    | --ASAYTSVASRVVANAGQGNL-----                                    | 359 |
| AnPe1B    | --AHPPGAIQWTKNAGQGK-----                                       | 359 |
| DdPe1C    | YSPVSAQCCKDKLPGYAGVGKNLATLTSTACK                               | 353 |
| BsPe1A    | YQVQSATQAKSSVEQHSQGVGIN-----                                   | 326 |
| VdPe1B    | YNLYGKNNVKARVYGTAGQTLGF-----                                   | 316 |

**Fig. S5. Primary sequence alignment of VdPe1B with BsPe1A, BsPe1A-P15, DdPe1C, AnPe1A, AnPe1B**  
VdPe1B primary sequence alignment with *Dickeya dadanti* DdPe1C (P11073), *Bacillus* Sp. KSM-P15  
BsPel-P15 (Q9RHW0), *Bacillus* sp. N16-5 BsPe1A (D0VP31), *Aspergillus niger* AnPe1A (Q01172), AnPe1B  
(Q00205). Conserved AA are red boxed.

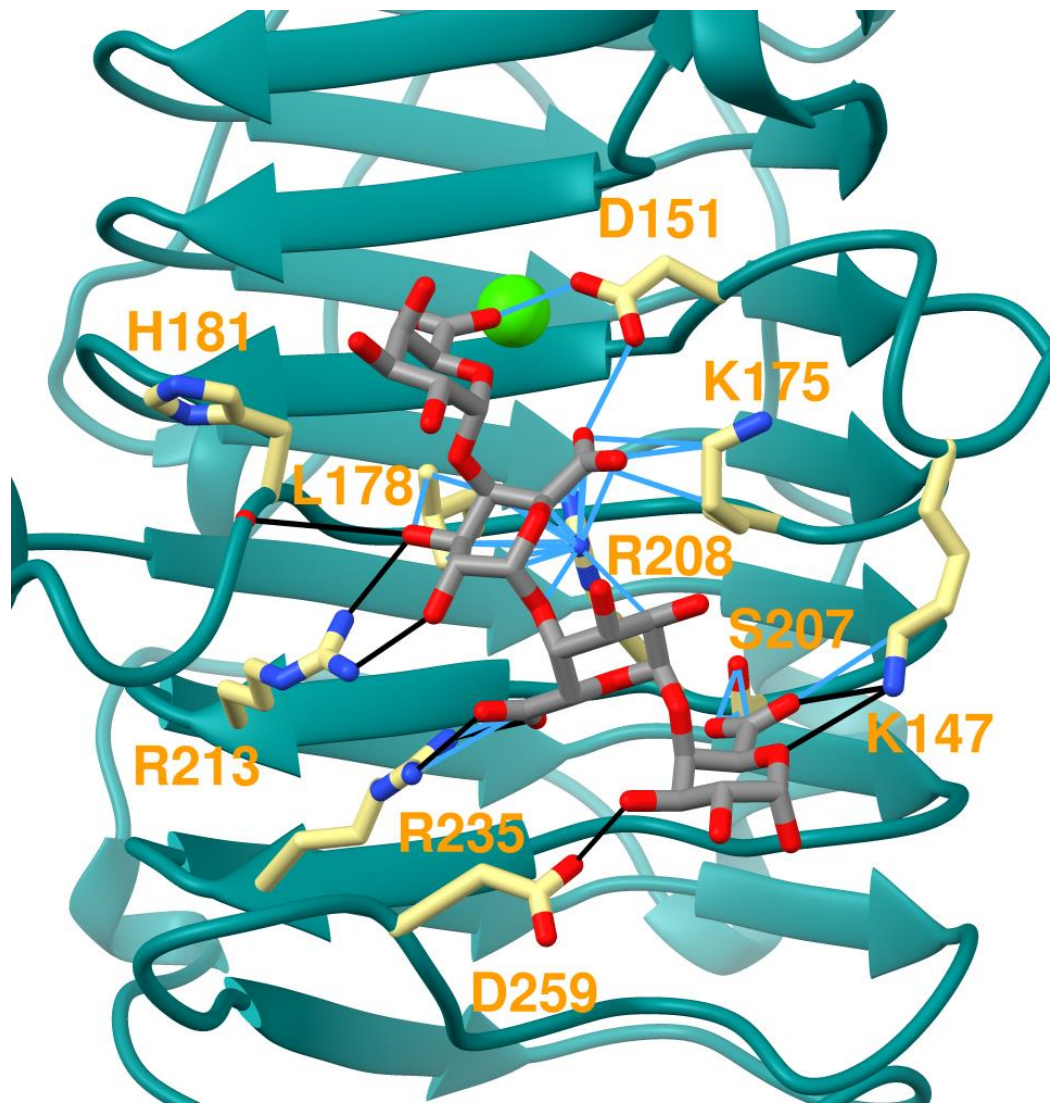

**Fig. S6. Superimposed tetramer ligand from DdPelC to VdPelB structure**

Tetramer ligand from DdPelC (PDB: 2EWE, gray) superimposed to VdPelB structure. Aa involved in interaction are yellow-coloured. Hydrogen bonds and Van der Waals contacts are coloured black and blue.

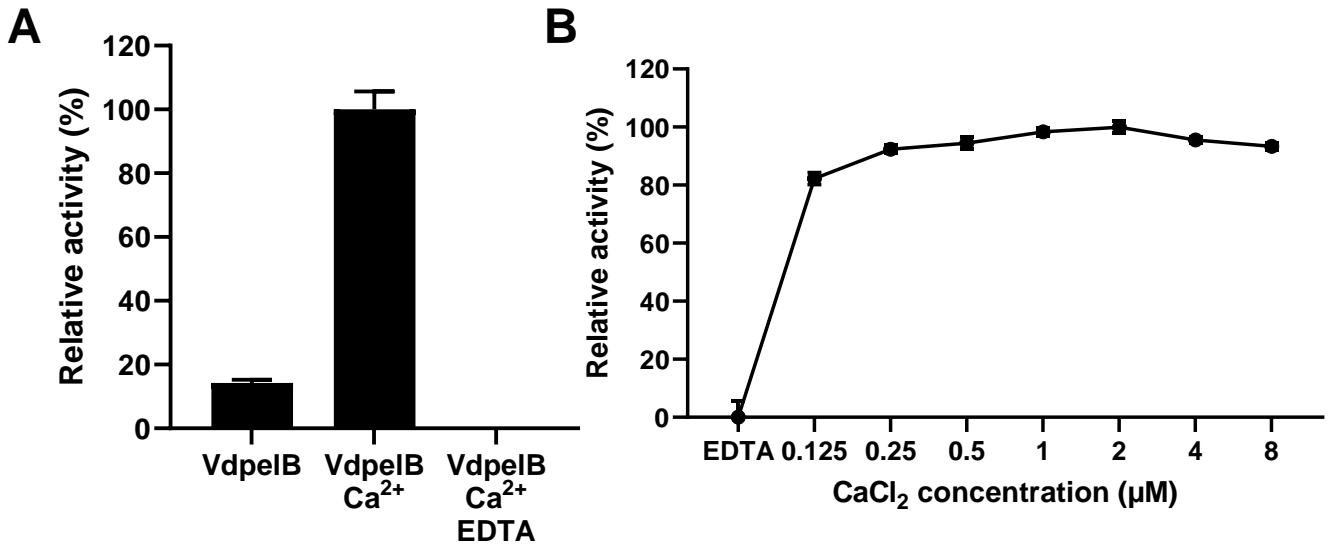

**Fig. S7. Effects of Ca<sup>2+</sup> on VdPelB activity**

A) Calcium dependence of VdPelB activity. The activities were measured after 12 min of incubation with PGA, with/without addition of Ca<sup>2+</sup> or Ca<sup>2+</sup> and EDTA, at 35°C B) PGA digested using VdPelB for 12 min at 40°C and pH 8 with increasing concentrations of Ca<sup>2+</sup>.



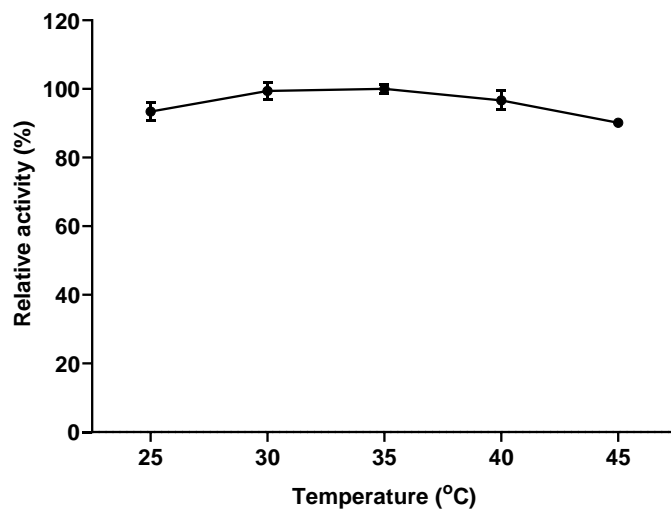

**Fig. S8. Temperature-dependence of VdPeIB-N activity**

The activities were measured after 8 min of incubation with PGA at pH 8. Values correspond to means of three replicates.

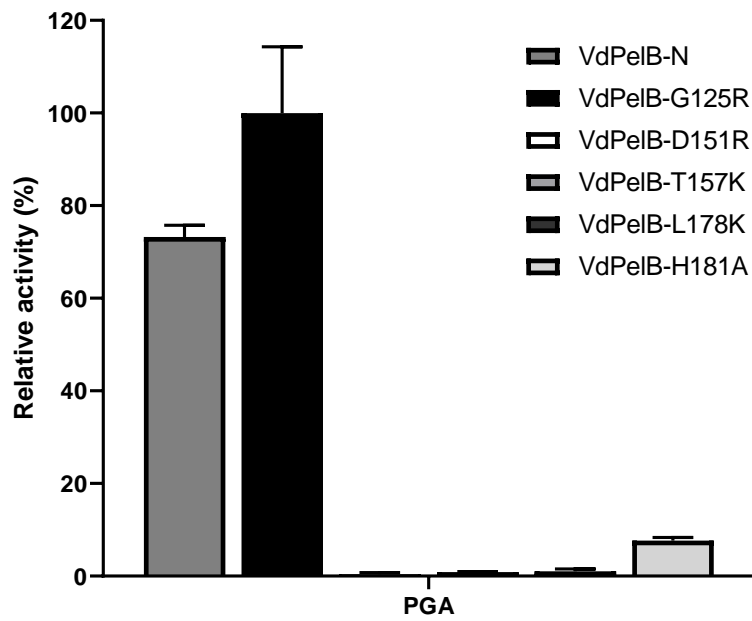

**Fig. S9. VdPelB mutants activity on PGA**

The activities were measured after 12 min of incubation with PGA with addition of  $\text{Ca}^{2+}$  at 35°C. Values correspond to means of three replicates  $\pm$  SD.

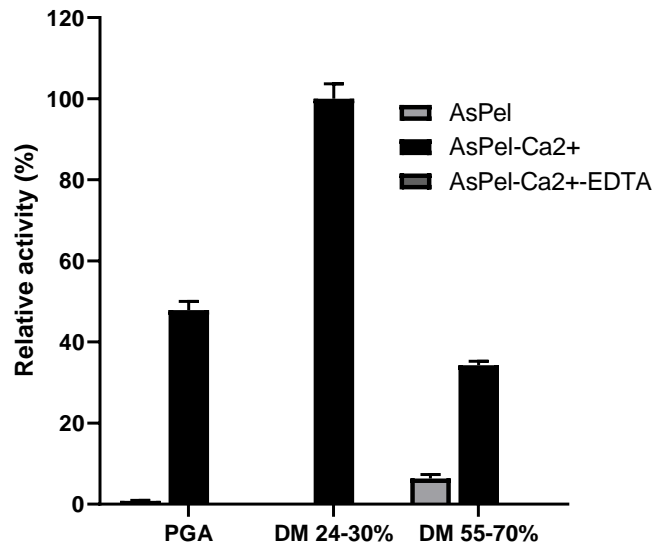

**Fig. S10. Substrate-dependence of AsPel**

The activities were measured after 12 min of incubation with PGA, pectins DM 24-30%, DM 55-70%, with/without addition of Ca<sup>2+</sup> or Ca<sup>2+</sup> and EDTA, at 35°C. Values correspond to means of three replicates ± SD.

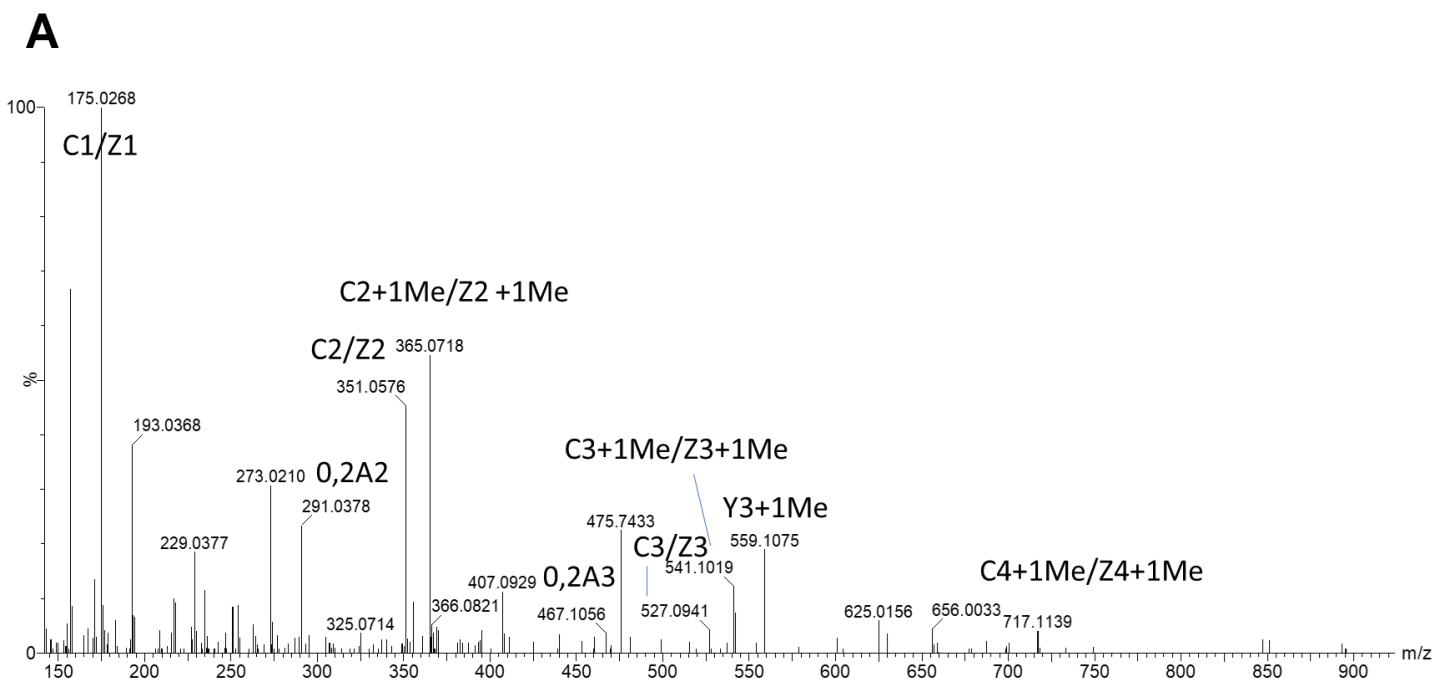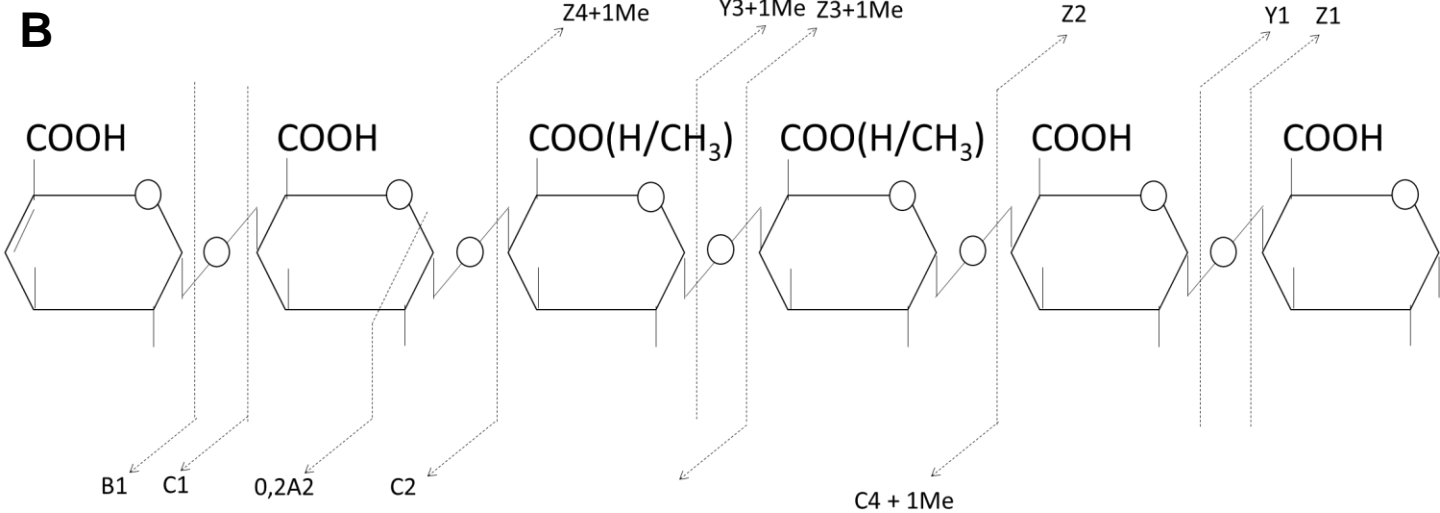

**Fig. S11 : Example of MS<sup>2</sup> fragmentation pattern of GalA<sub>6</sub>Me<sub>1</sub>-H<sub>2</sub>O**

MS<sup>2</sup> fragmentation pattern of GalA<sub>6</sub>-H<sub>2</sub>O oligomer (m/z 1055,185252, 527,0889878) produced by VdPeIB from pectin DM >85%. Subscript numbers indicate the degree of polymerization.

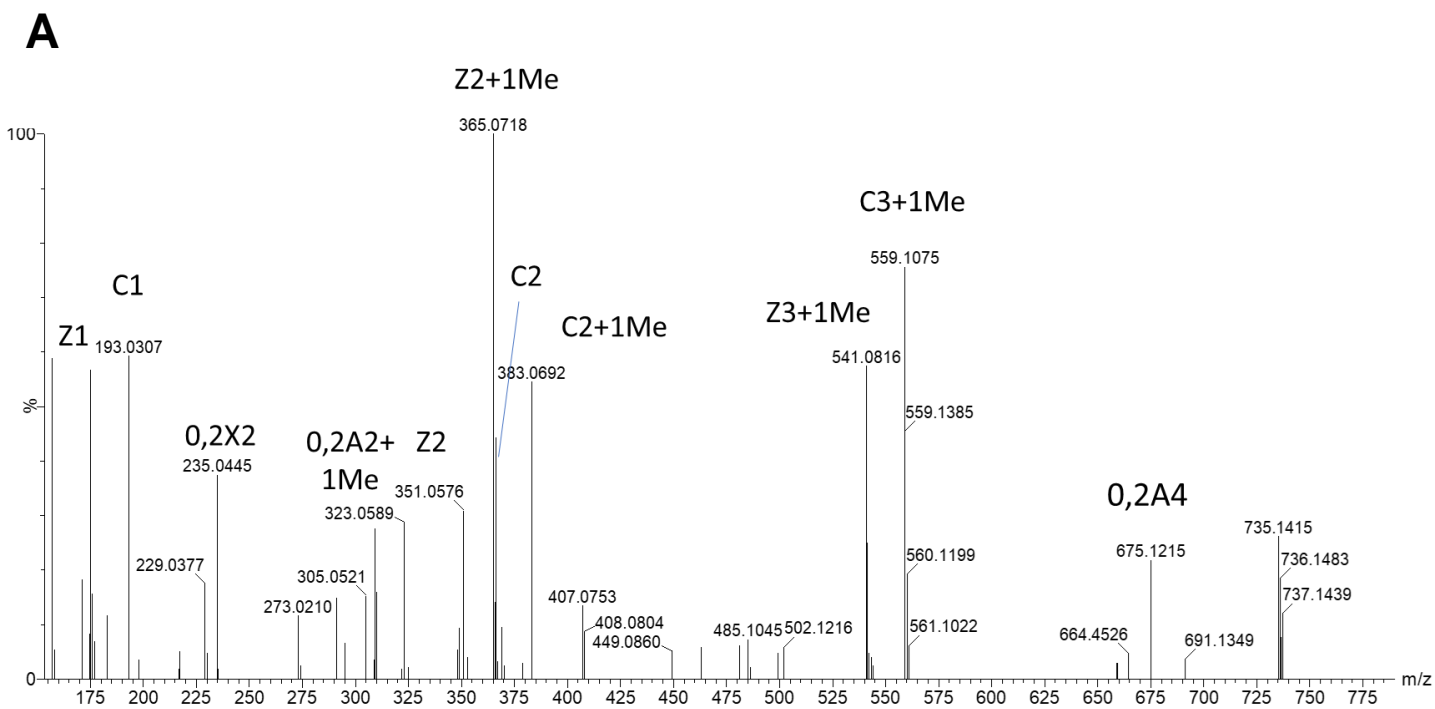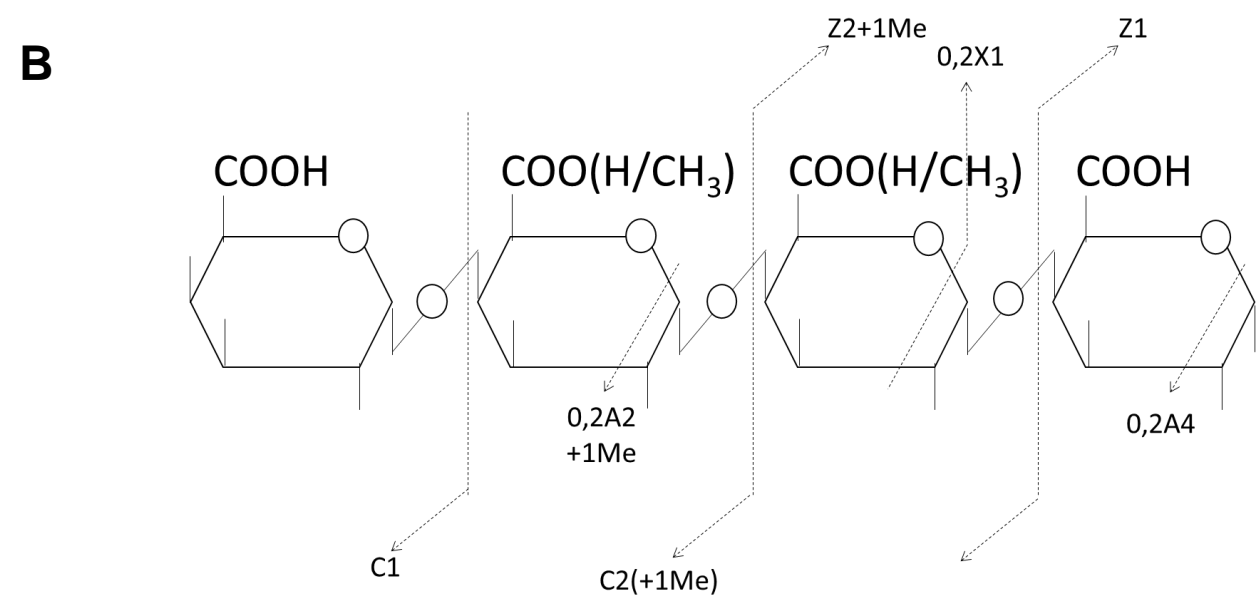

**Fig. S12 : Example of MS<sup>2</sup> fragmentation pattern of GalA<sub>4</sub>Me<sub>1</sub>**  
 MS<sup>2</sup> fragmentation pattern of GalA<sub>4</sub>Me<sub>1</sub> oligomer ( $m/z$  735,1472907) produced by VdPelB from pectin DM >85%. Subscript numbers indicate the degree of polymerization.
